# Supplementary material for: Novel Thiazolylketenyl Quinazolinones as Potential Anti-MRSA Agents and Allosteric Modulator for PBP2a
Source: Molecules. 2023 May 22;28(10):4240. doi: 10.3390/molecules28104240 (PMC10221040; doi:10.3390/molecules28104240)

## Supplementary Information

### Title:

Novel Thiazolylketenyl Quinazolinones and Analogues as Potential Anti-MRSA Agents and Allosteric Modulator for PBP2a

### Author names and affiliations:

Jie Dai <sup>1</sup>, Narsaiah Battini <sup>1</sup>, Zhonglin Zang <sup>1,\*</sup>, Yan Luo <sup>2,\*</sup> and Chenghe Zhou <sup>1,\*</sup>

<sup>1</sup> Institute of Bioorganic & Medicinal Chemistry, Key Laboratory of Applied Chemistry of Chongqing Municipality, School of Chemistry and Chemical Engineering, Southwest University, Chongqing 400715, China.

<sup>2</sup> College of Pharmacy, National & Local Joint Engineering Research Center of Targeted and Innovative Therapeutics, Chongqing Key Laboratory of Kinase Modulators as Innovative Medicine, Chongqing University of Arts and Sciences, Chongqing, 402160, China

\*Corresponding authors:

Tel.: +86-23-68254967; Fax: +86-23-68254967, E-mail: zhouch@swu.edu.cn (Cheng-He Zhou); zhonglinzang@swu.edu.cn (Zhong-Lin Zang); lygytha456@163.com (Yan Luo)

### 1. Antibacterial activity

**Table S1** Antibacterial data (MIC,  $\mu\text{g/mL}$ ) for thiazolylketenyl quinazolinone **4** against MRSA and *S. aureus*.

| Comps       | MRSA  | <i>S. a.</i> | <i>S. a.</i> | <i>S. a.</i> | <i>S. a.</i> |
|-------------|-------|--------------|--------------|--------------|--------------|
|             | 43300 | 26003        | 26001        | 12600        | 6538         |
| <b>4</b>    | 1     | 8            | 4            | 1            | 2            |
| Norfloxacin | 4     | 1            | 4            | 2            | 4            |

**Table S2** Minimum bactericidal concentration (MBC,  $\mu\text{g/mL}$ ) of active compound **4** against MRSA.

| Bacteria | Compound | MIC | MBC | MBC/MIC | Effect         |
|----------|----------|-----|-----|---------|----------------|
| MRSA     | <b>4</b> | 0.5 | 8   | 16      | Bacteriostatic |

### 2. Hemolytic activity

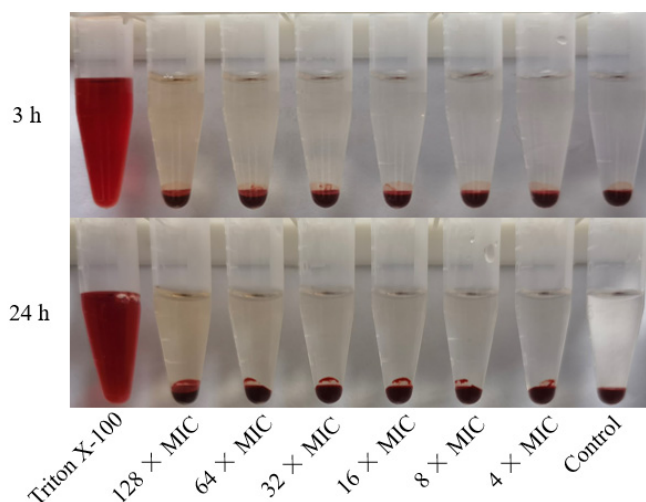

**Figure S1** Images of RBC processed with compound **4** at different times.

### 3. ADMET study

The radar plot bears six axes for six important properties for oral bioavailability: saturation (INSATU), size (SIZE), polarity (POLAR), solubility (INSOLU), lipophilicity (LIPO) and flexibility (FLEX). **Figure S2** showed that compound **4** almost fall in the pink area and reference drug norfloxacin was completely in this area, which revealed that candidate compound **4** had good drug-likeness and bioavailability profile.

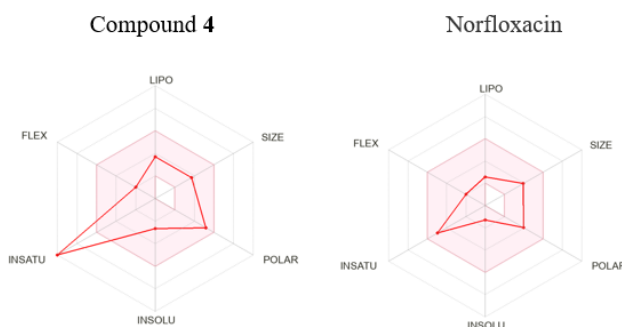

**Figure S2** Bioavailability radar charts from swiss ADME web tool for compound **4** and norfloxacin.

### 4. Interactions of 7 with calf thymus DNA

Equation (1) is utilized to calculate the binding constant ( $K$ ). Where  $A^0$  and  $A$  are the absorbance of DNA in the absence and presence of compound **4** at 260 nm,  $\xi_C$  and  $\xi_{D-C}$  represent the absorption coefficients of compound **4** and compound **4**-DNA complex respectively (**Figure S3**).

$$\frac{A^0}{A - A^0} = \frac{\xi_C}{\xi_{D-C} - \xi_C} + \frac{\xi_C}{\xi_{D-C} - \xi_C} \times \frac{1}{K[Q]} \quad (1)$$

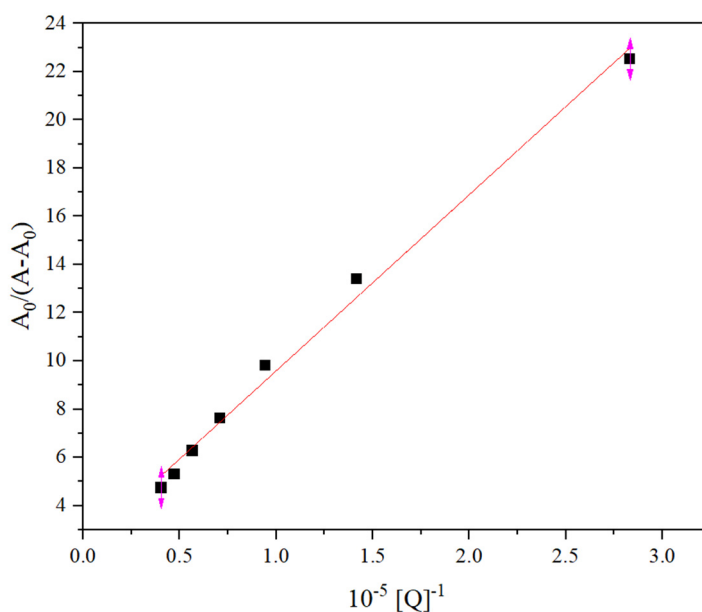

**Figure S3** The plot of  $A^0 / (A - A^0)$  versus  $1/[ \text{compound } 4]$ , yielding the binding constant,  $K = 1.01 \times 10^5 \text{ L/mol}$ ,  $R = 0.996$ ,  $SD = 0.039$  ( $R$  is the correlation coefficient.  $SD$  is standard deviation).

### 5. Characterizations of some representative compounds

## 5.1 Spectra of compound 4

### $^1\text{H}$ NMR spectrum

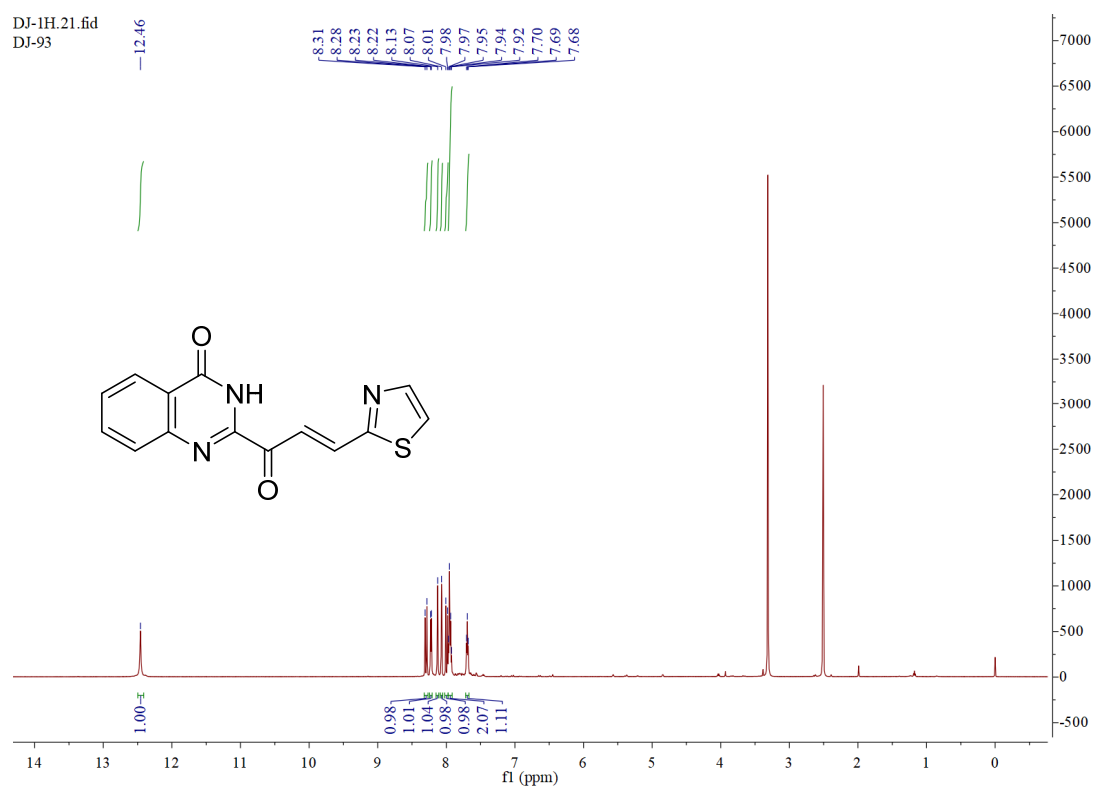

### $^{13}\text{C}$ NMR spectrum

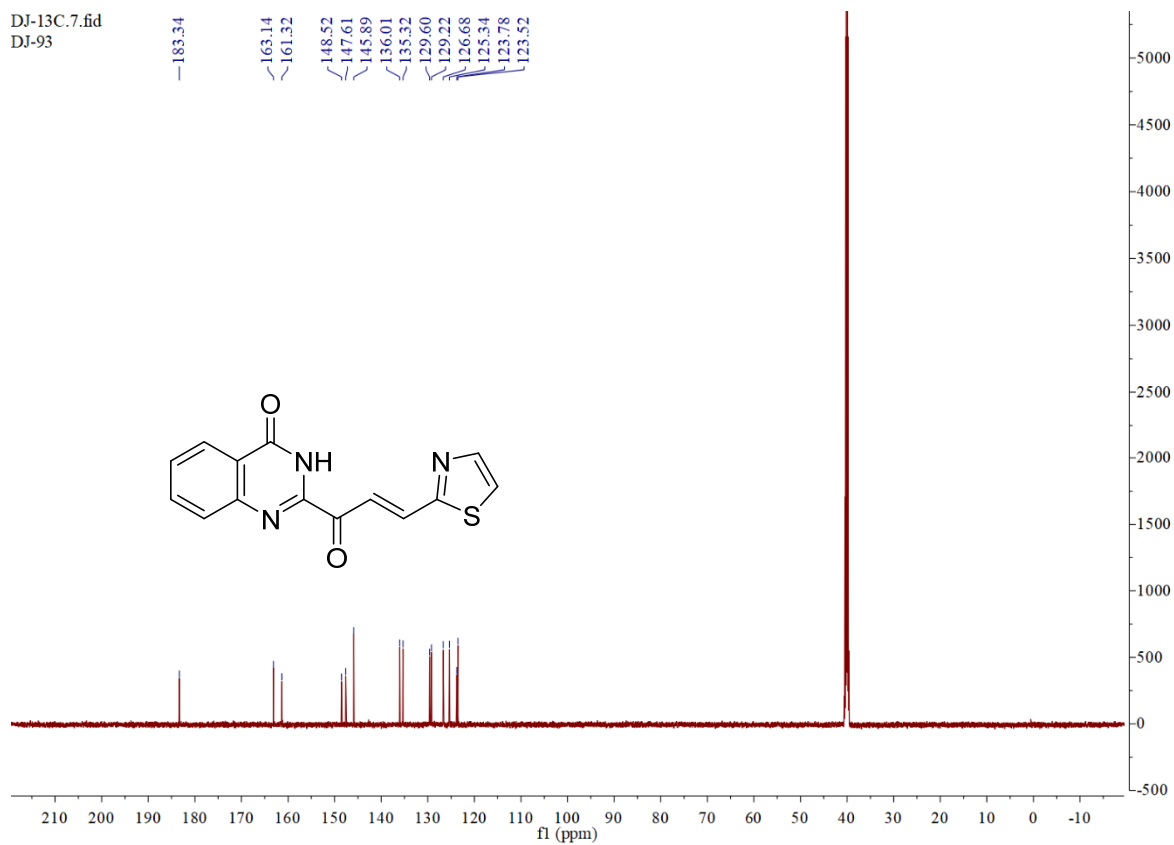

### HRMS spectrum

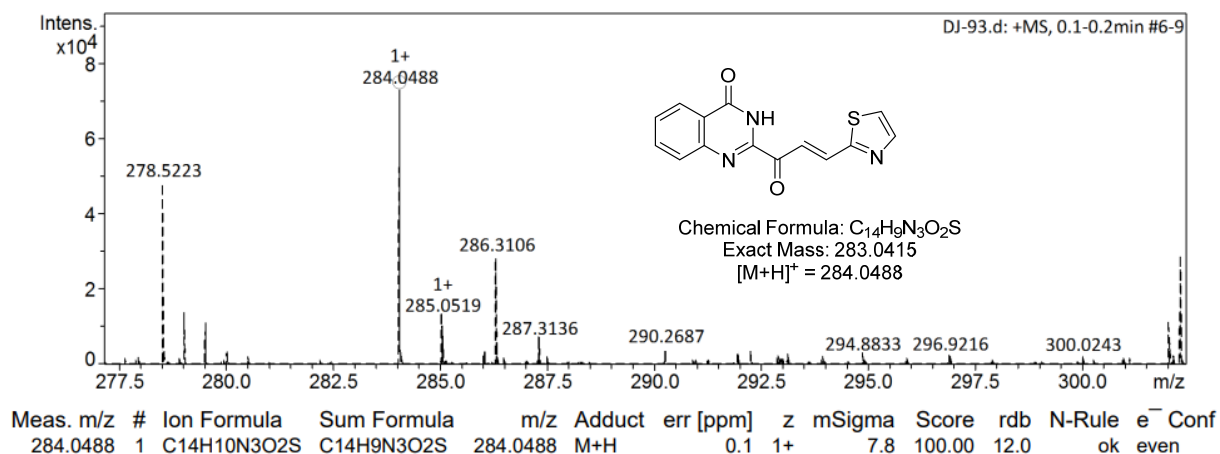

HPLC spectrum

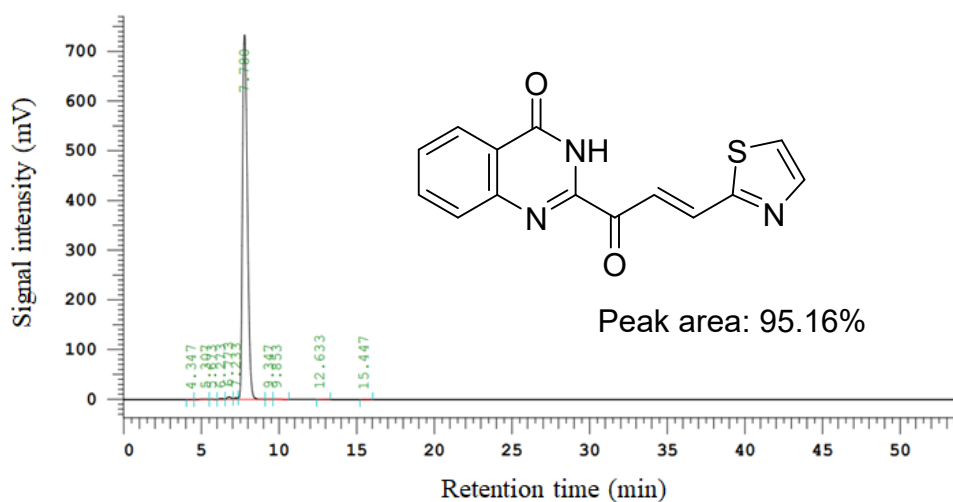

## 5.2 Spectra of compound **5a**

$^1H$  NMR spectrum

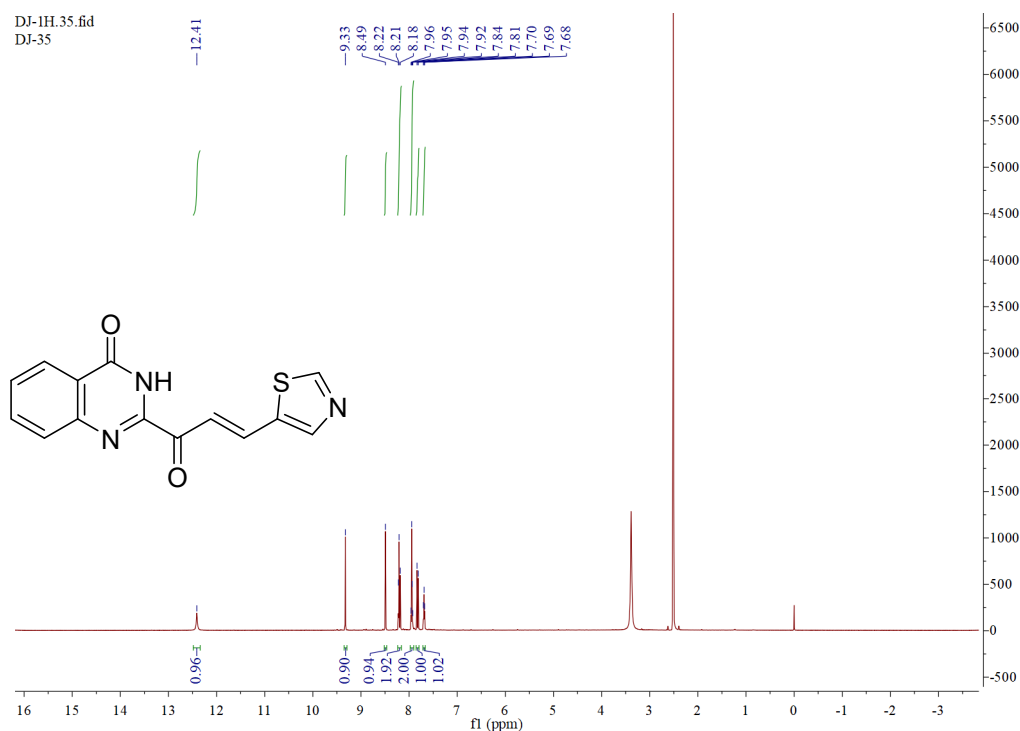

### <sup>13</sup>C NMR spectrum

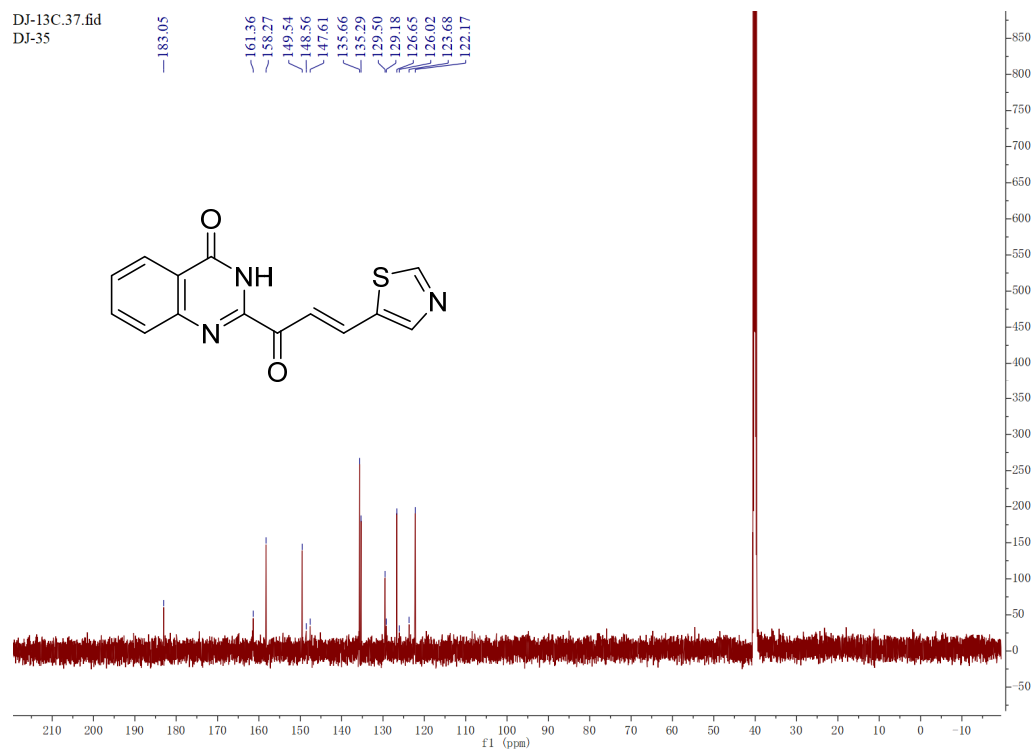

### HRMS spectrum

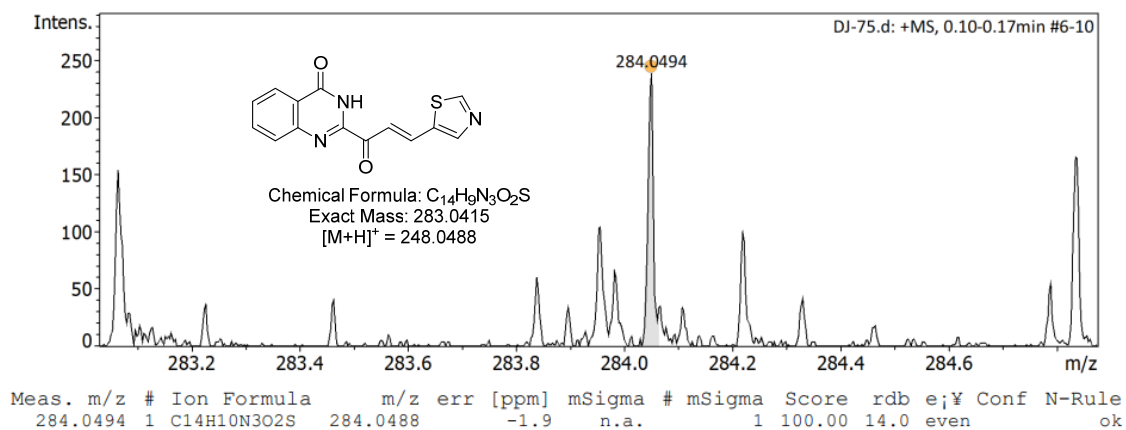

### HPLC spectrum

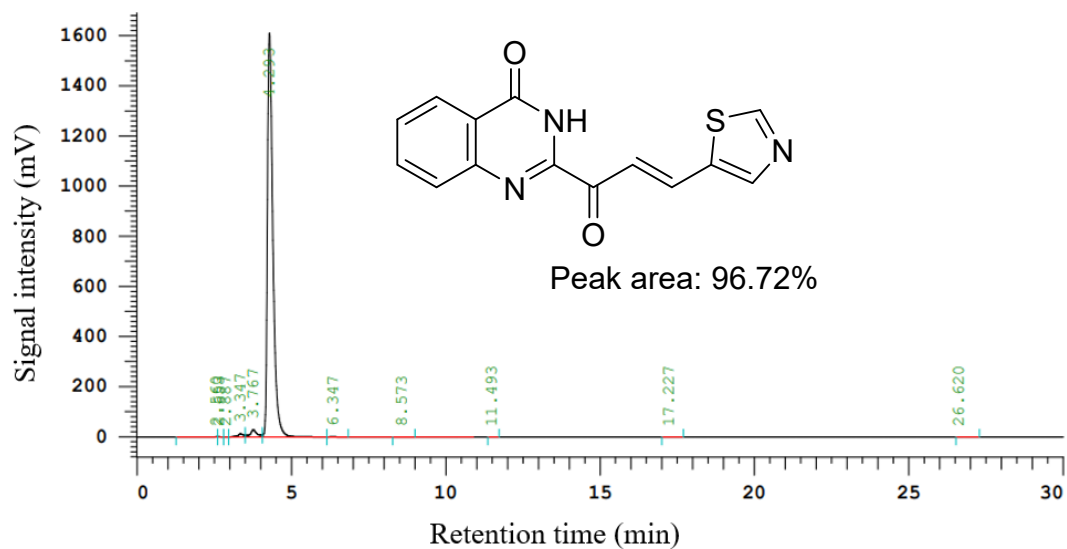

### 5.3 Spectra of compound **5b**

#### <sup>1</sup>H NMR spectrum

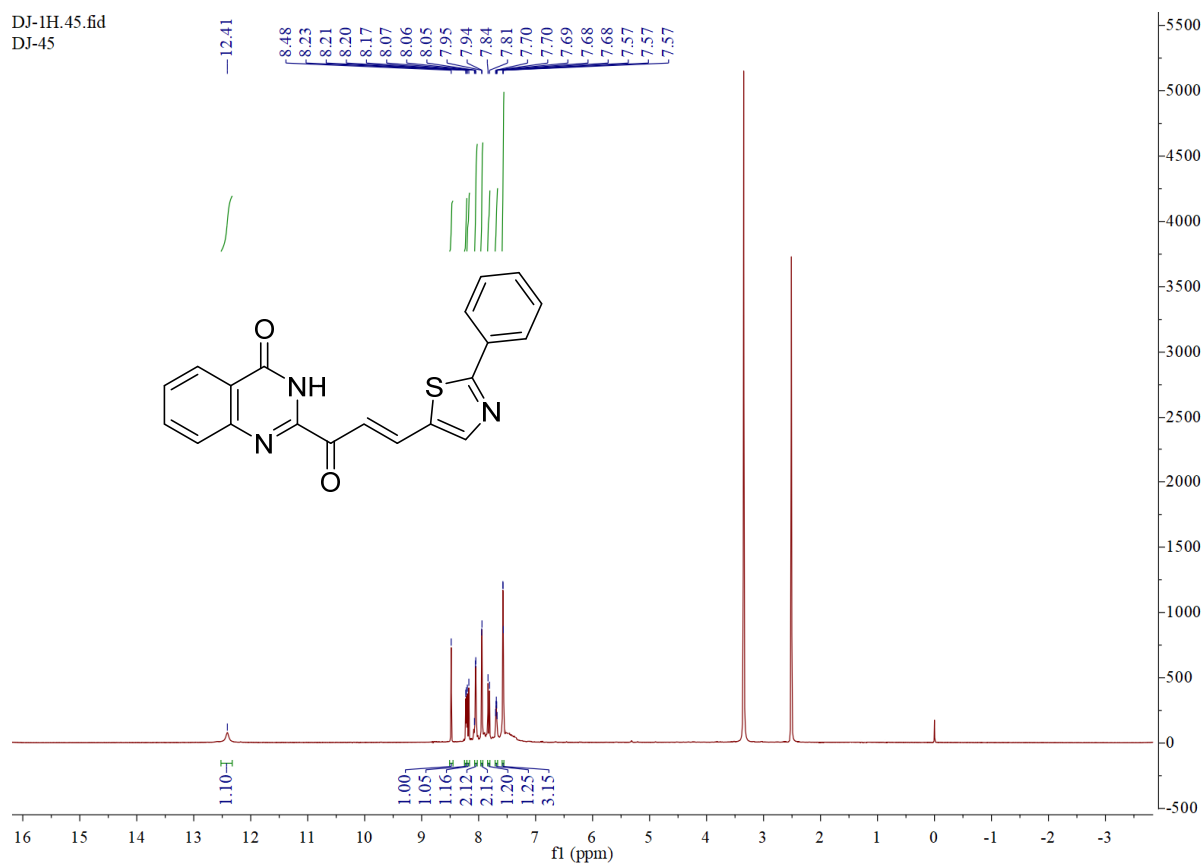

#### HRMS spectrum

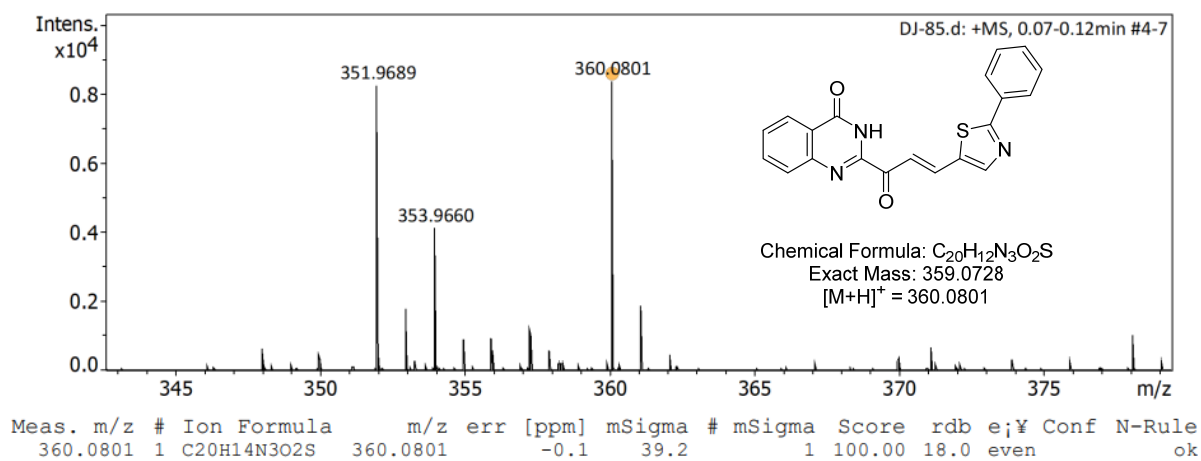

### 5.4 Spectra of compound **6a**

#### <sup>1</sup>H NMR spectrum

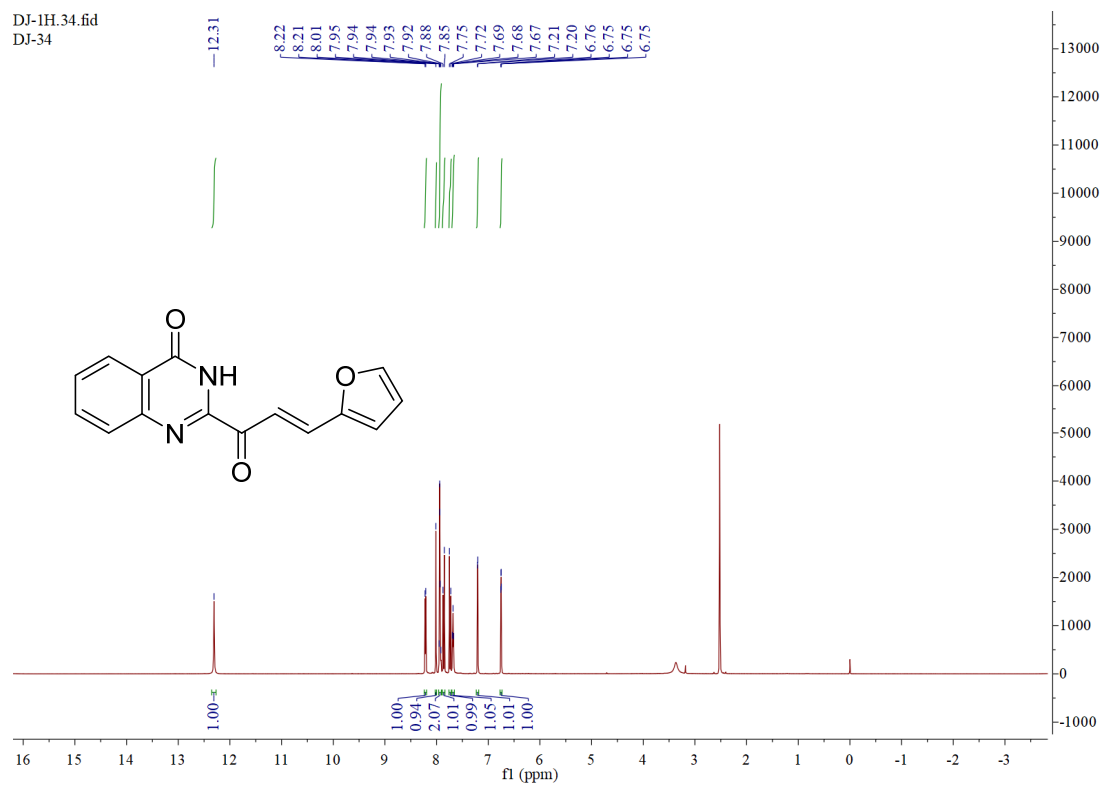

# <sup>13</sup>C NMR spectrum

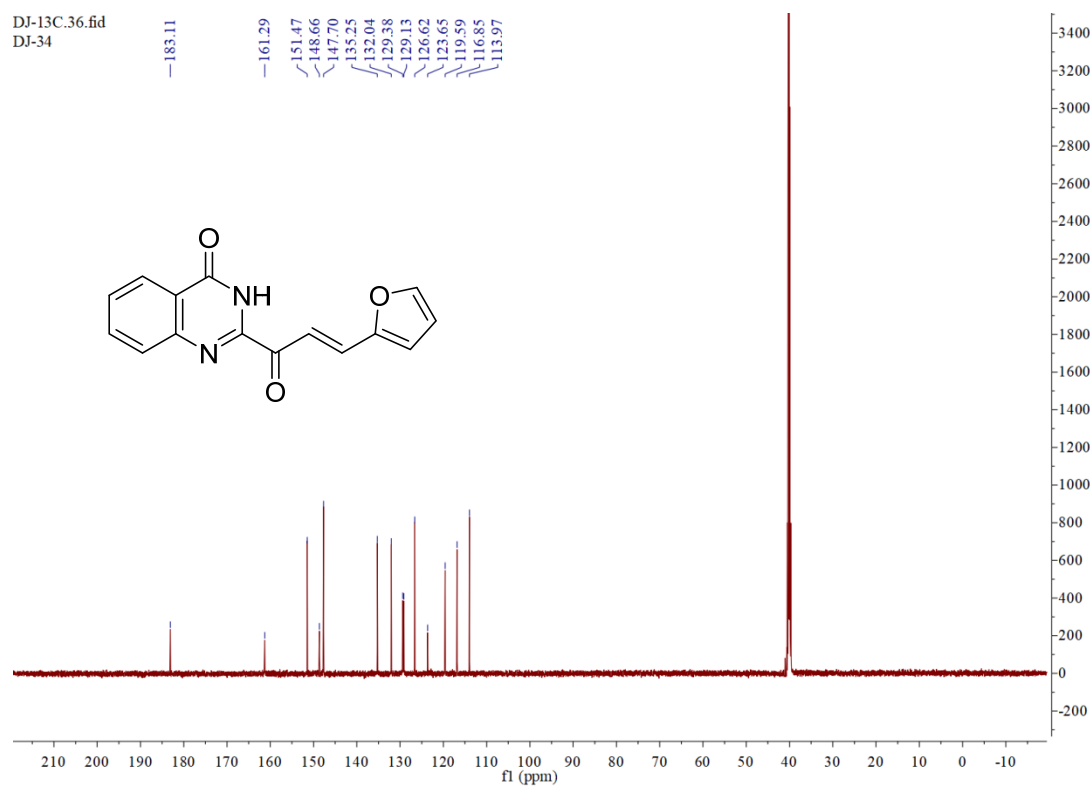

# HRMS spectrum

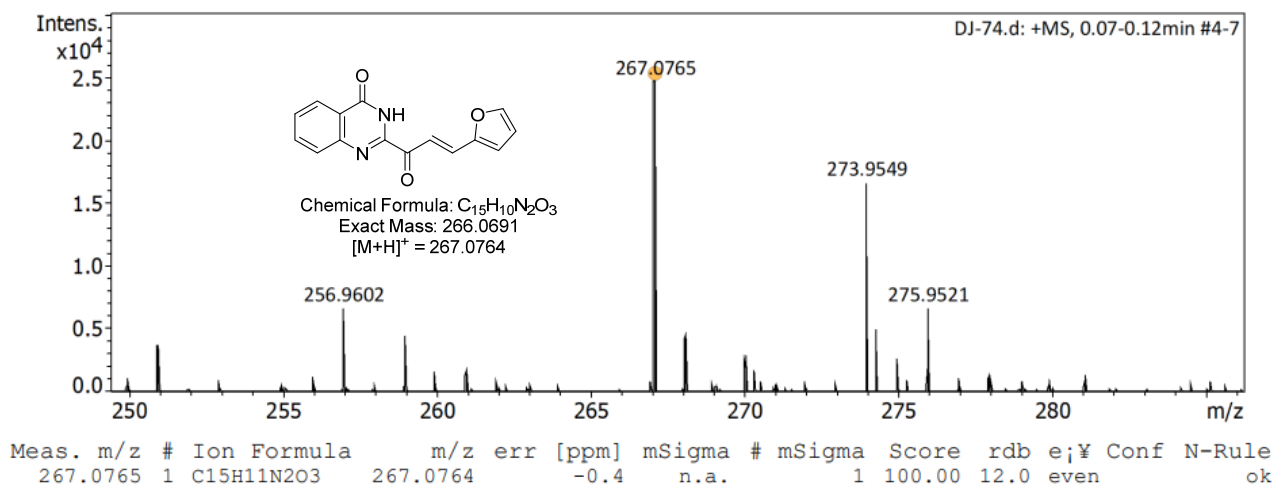

HPLC spectrum

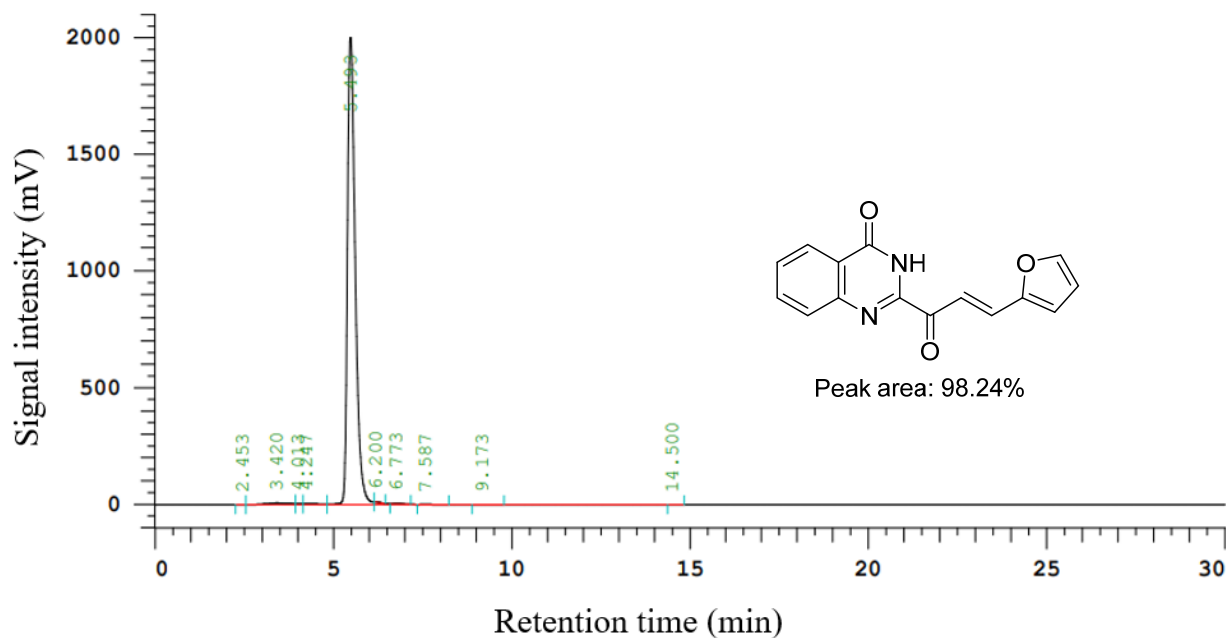

## 5.5 Spectra of compound **6b**

### <sup>1</sup>H NMR spectrum

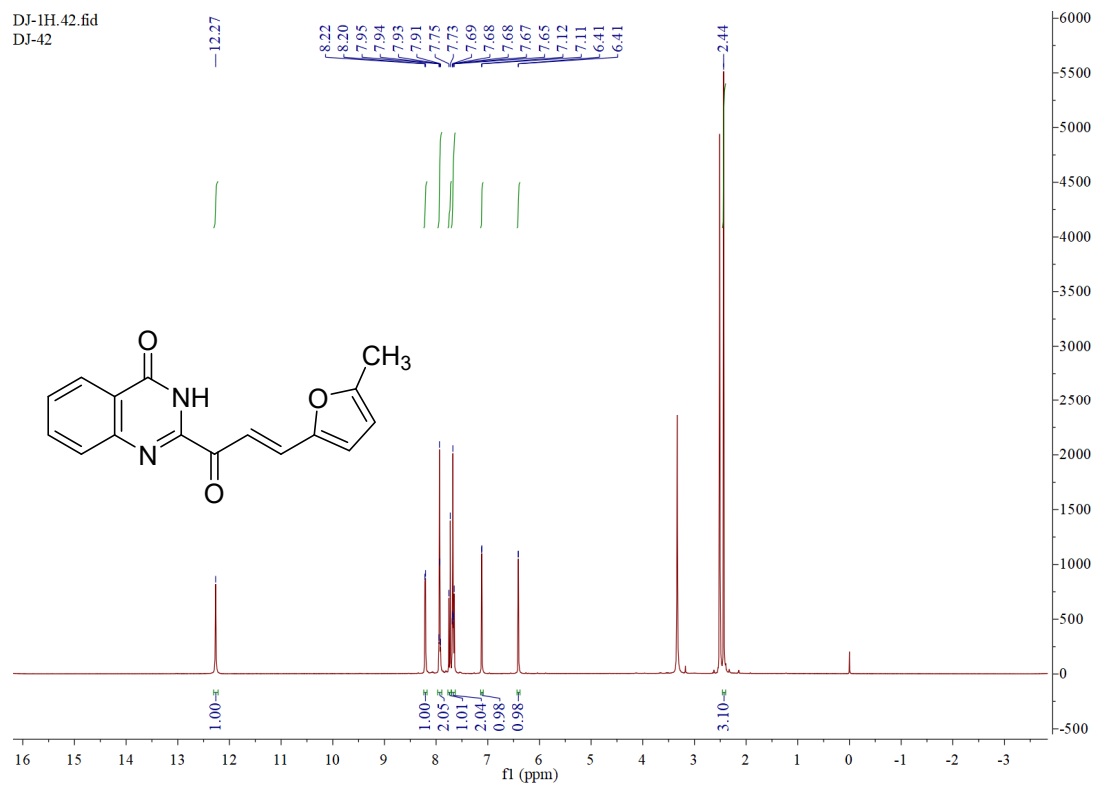

<sup>13</sup>C NMR spectrum

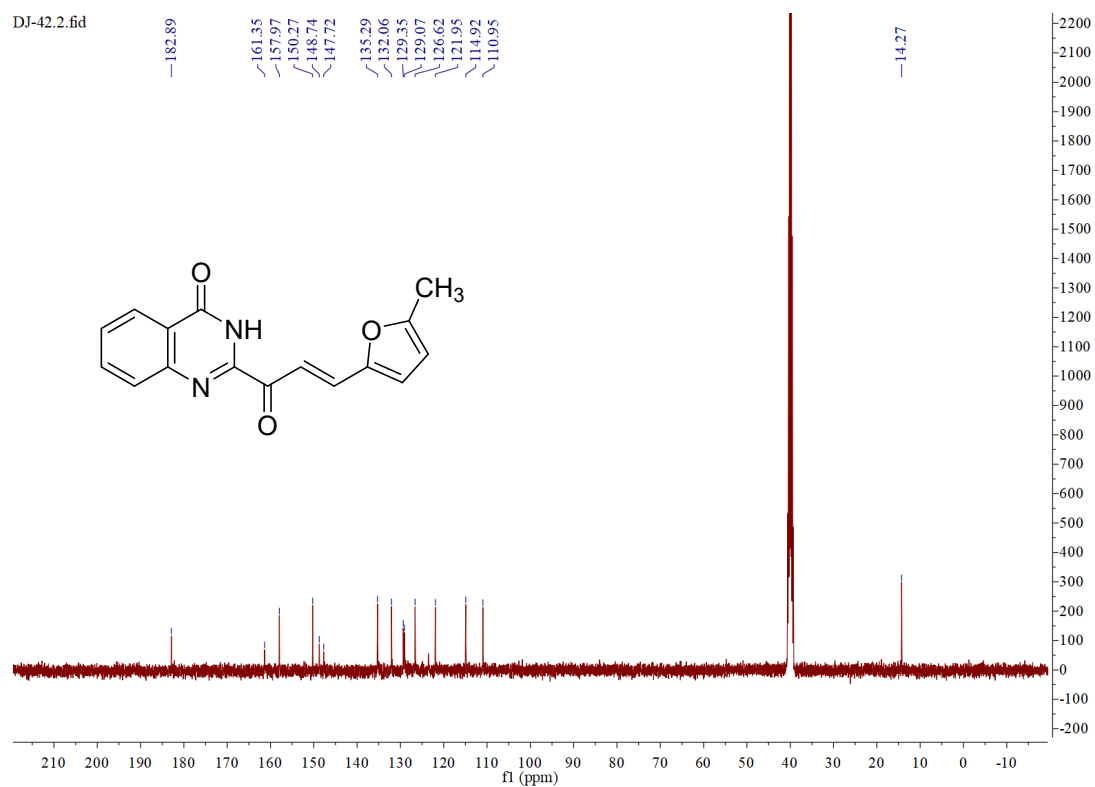

HRMS spectrum

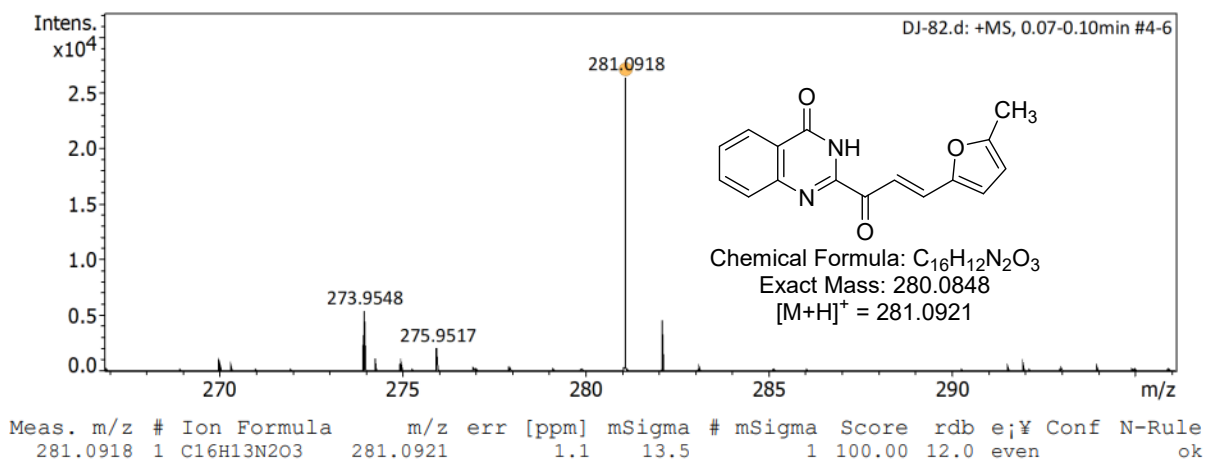

HPLC spectrum

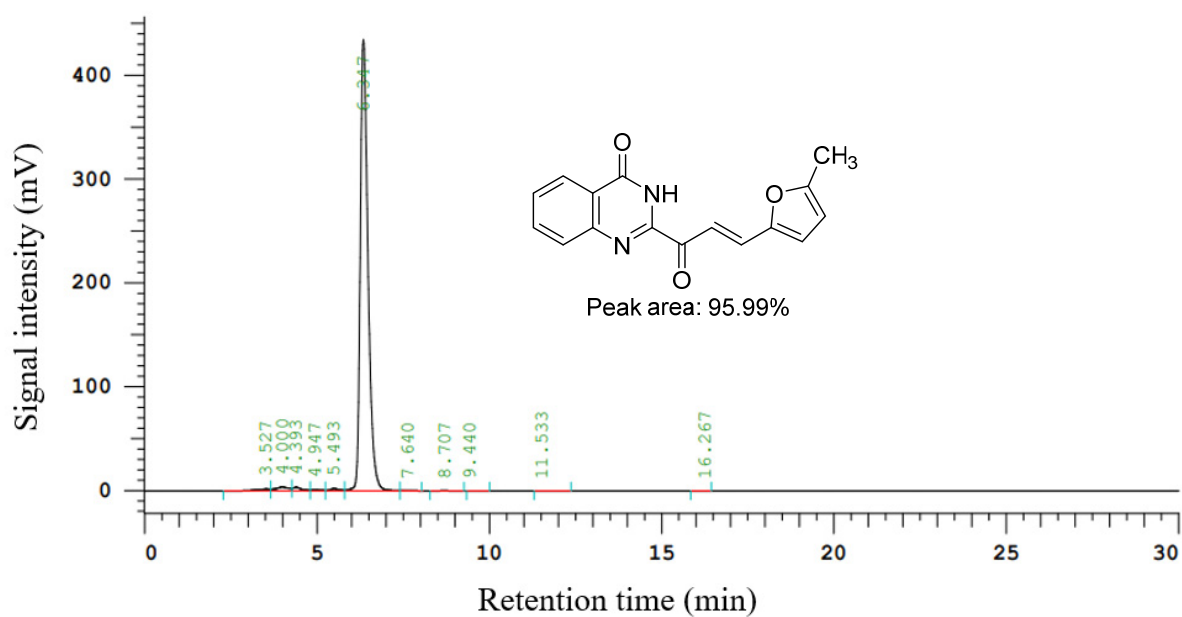

## 5.6 Spectra of compound 6c

### <sup>1</sup>H NMR spectrum

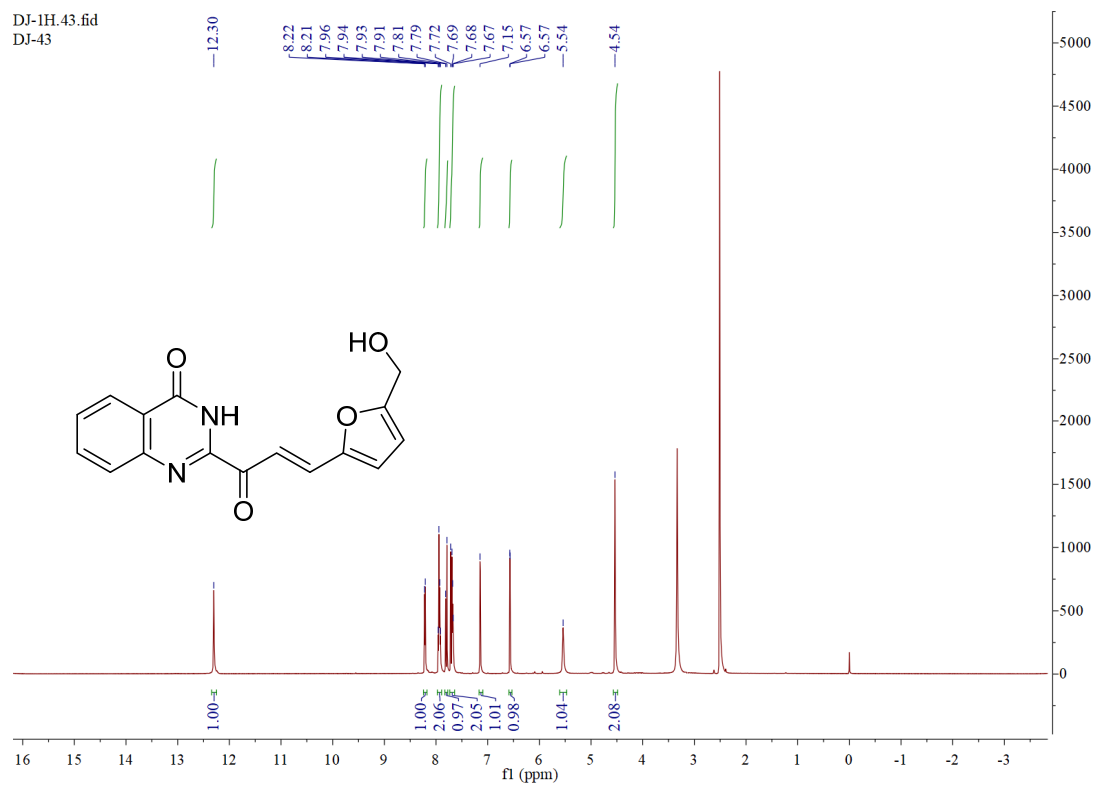

### <sup>13</sup>C NMR spectrum

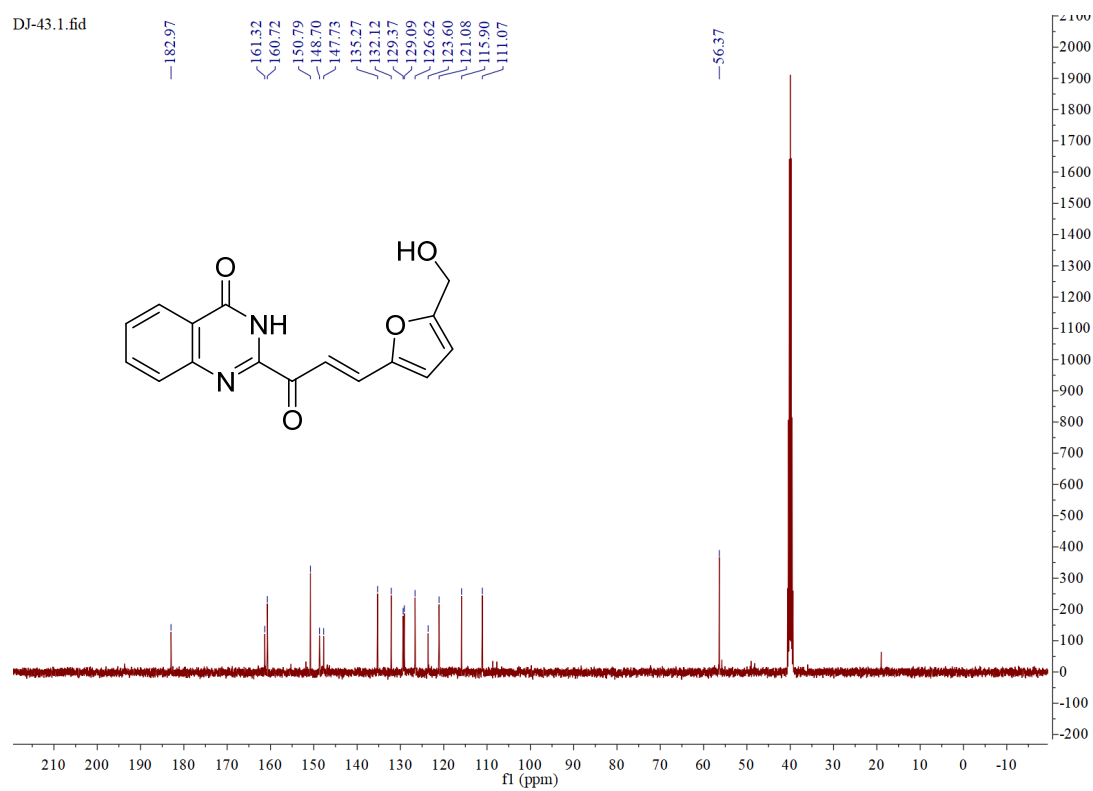

### HRMS spectrum

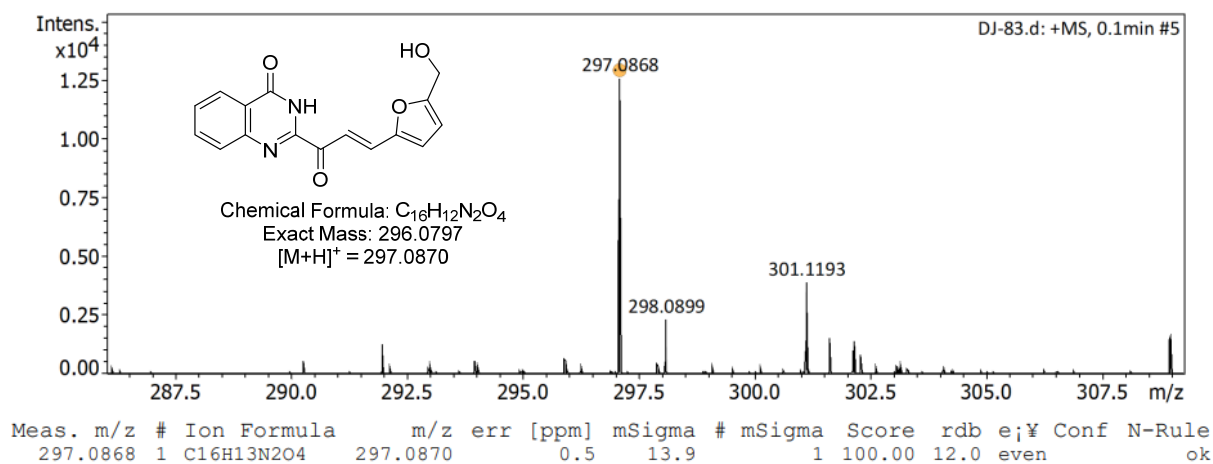

HPLC spectrum

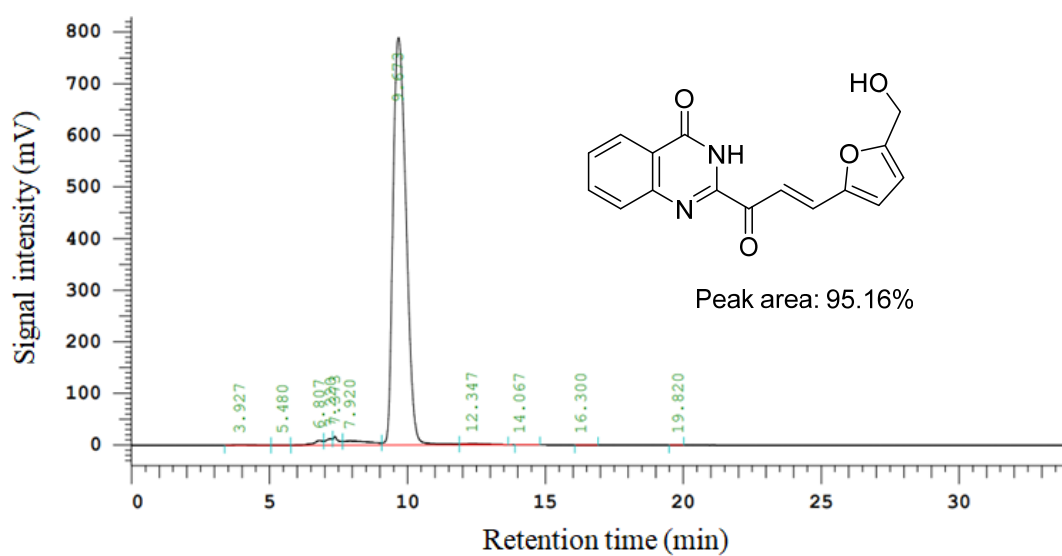

## 5.7 Spectra of compound **7a**

### $^1H$ NMR spectrum

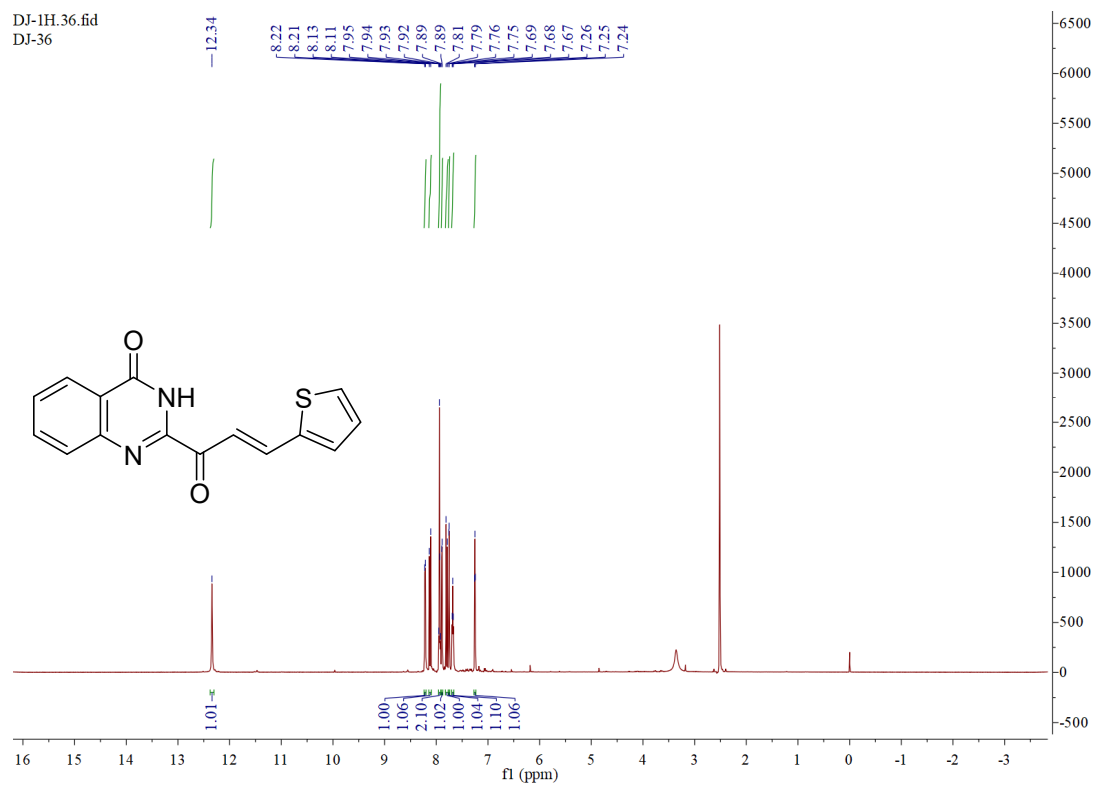

### <sup>13</sup>C NMR spectrum

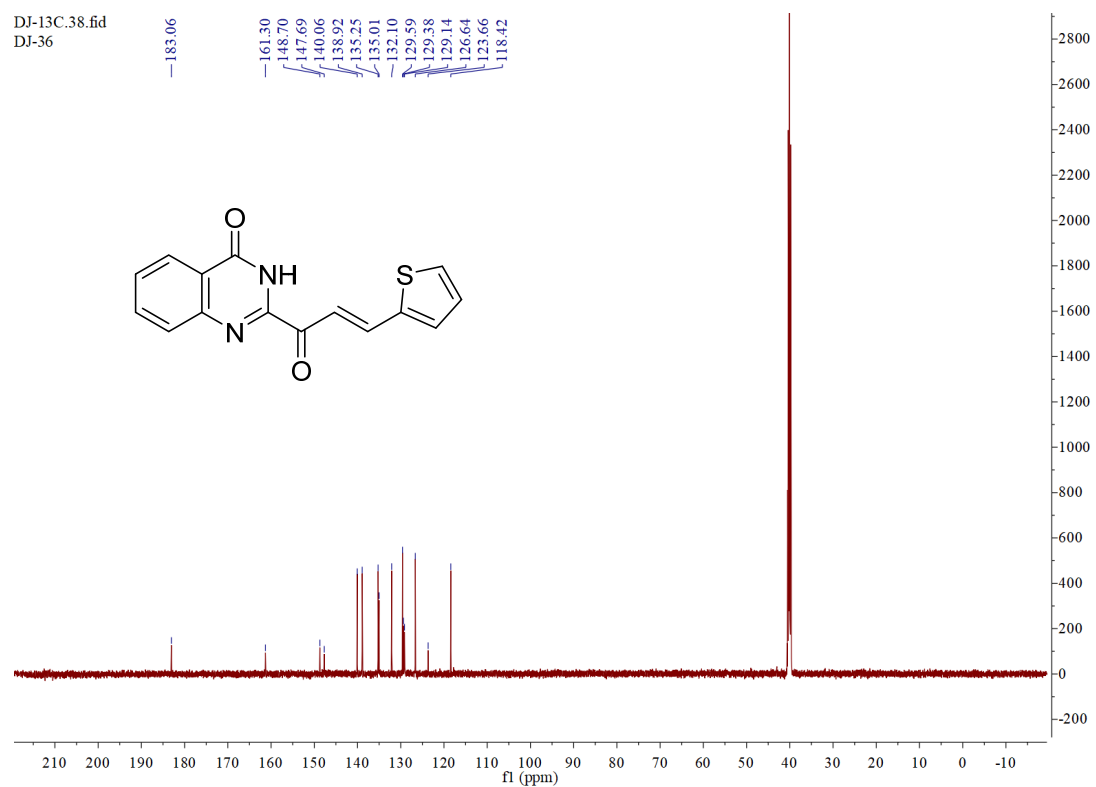

### HRMS spectrum

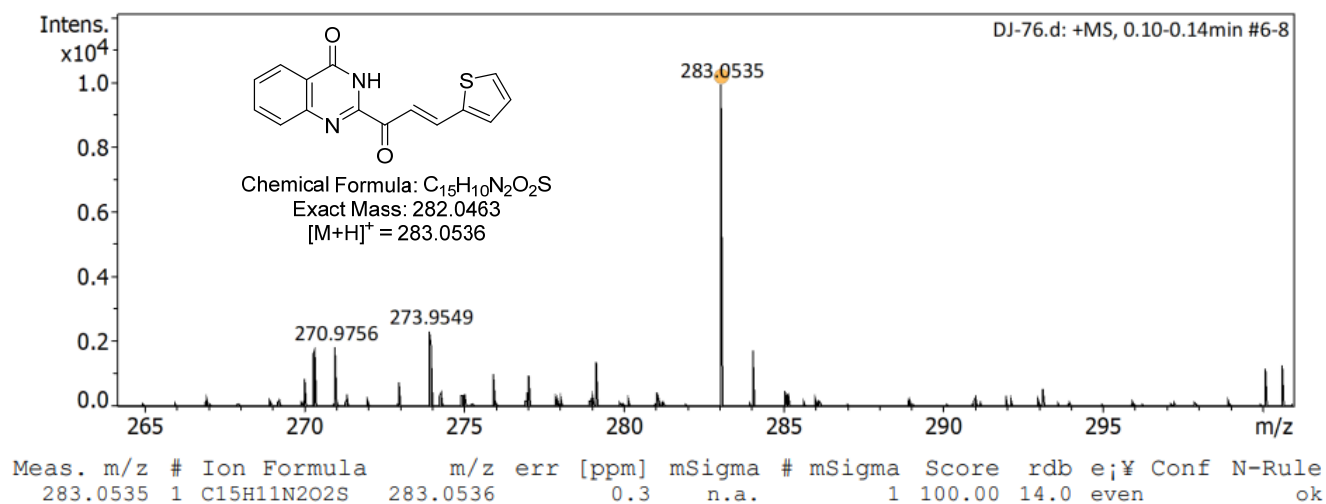

HPLC spectrum

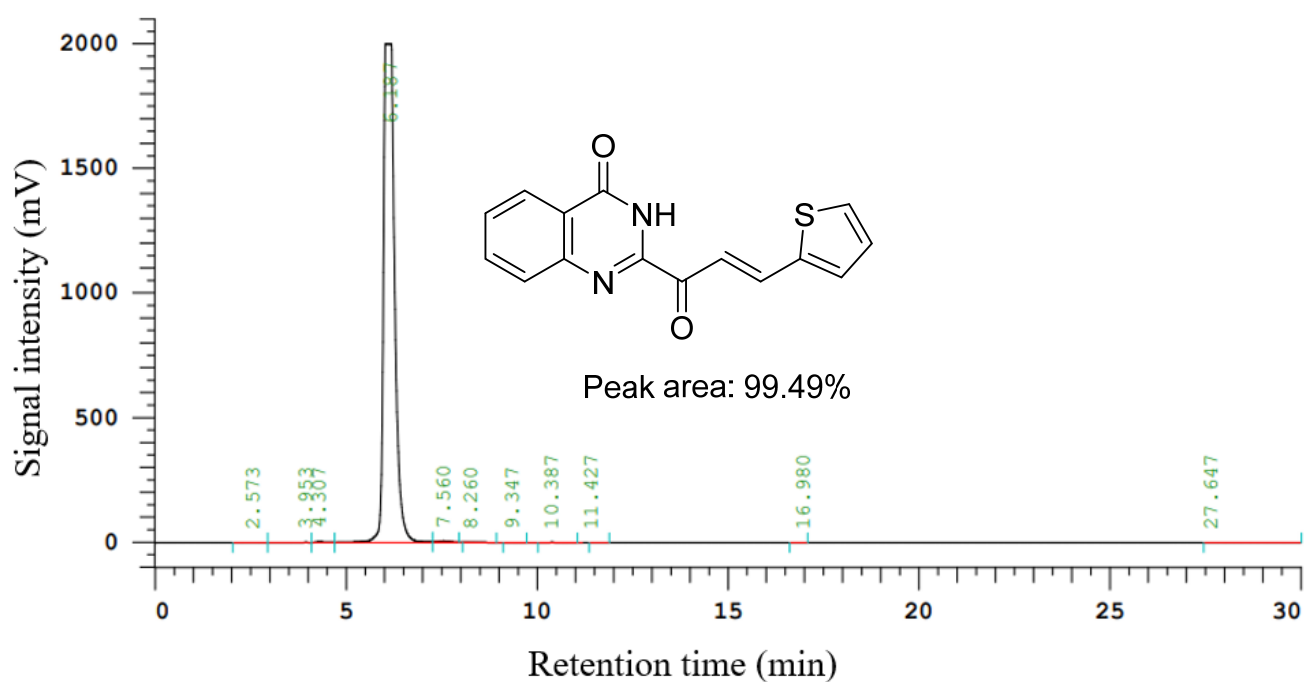

## 5.8 Spectra of compound 7b

### <sup>1</sup>H NMR spectrum

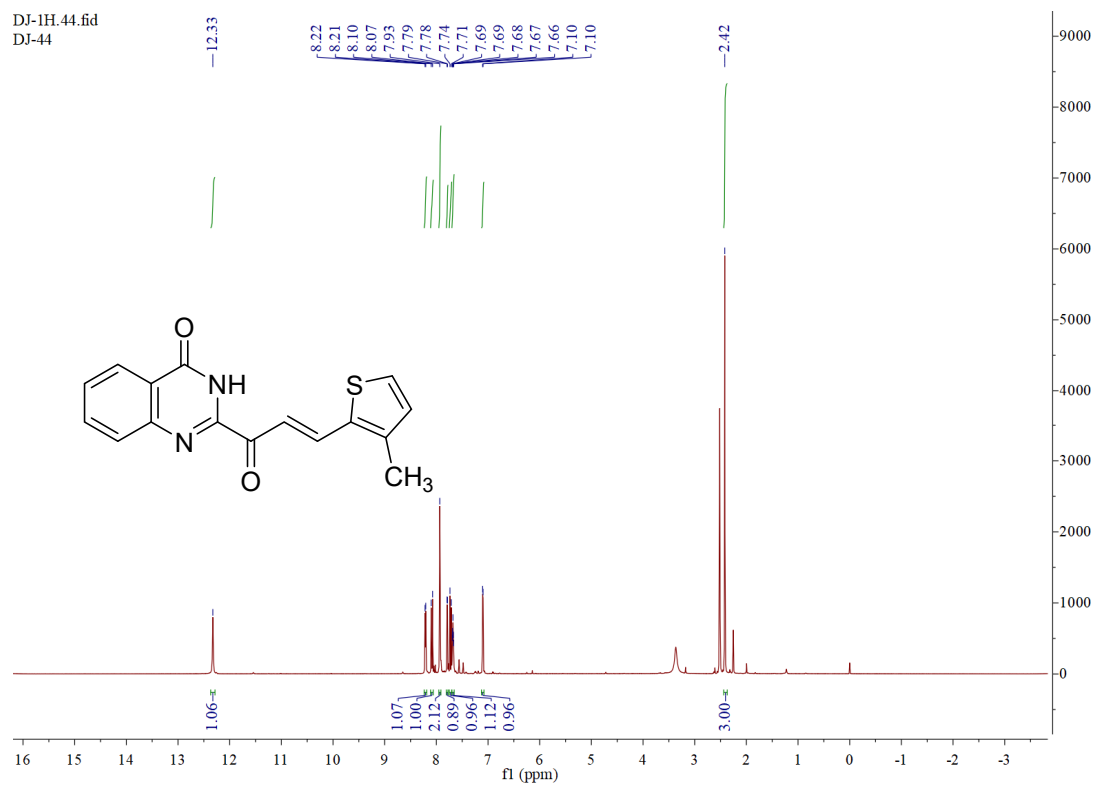

### <sup>13</sup>C NMR spectrum

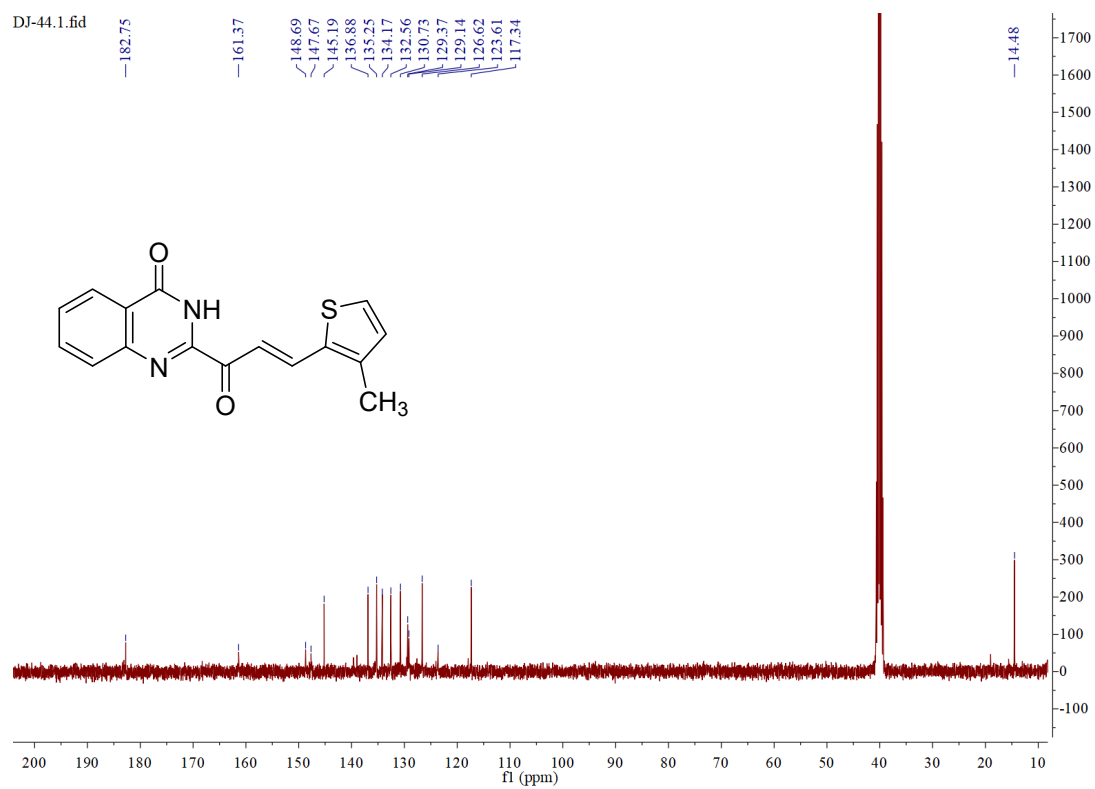

### HRMS spectrum

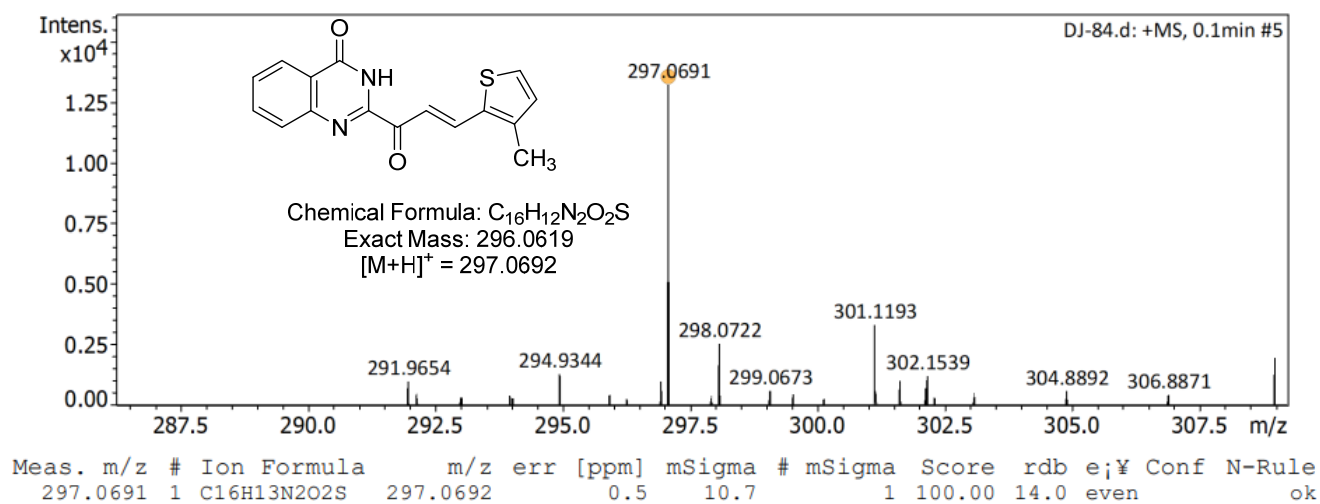

HPLC spectrum

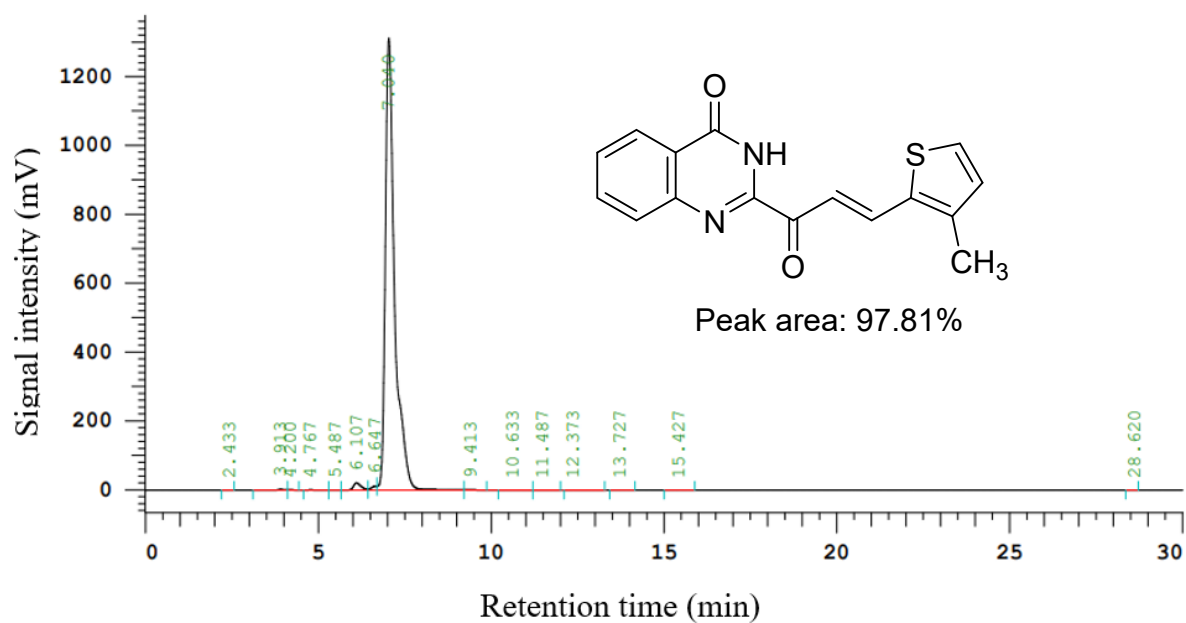

5.9 Spectra of compound **8a**

<sup>1</sup>H NMR spectrum

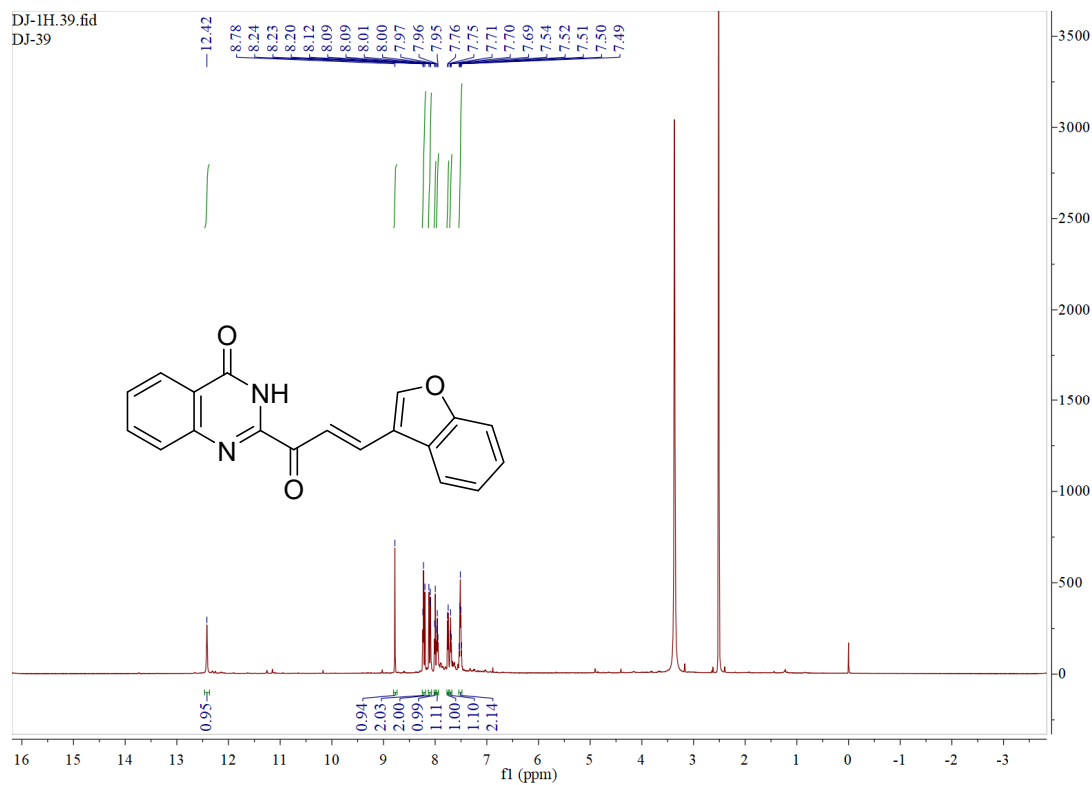

### <sup>13</sup>C NMR spectrum

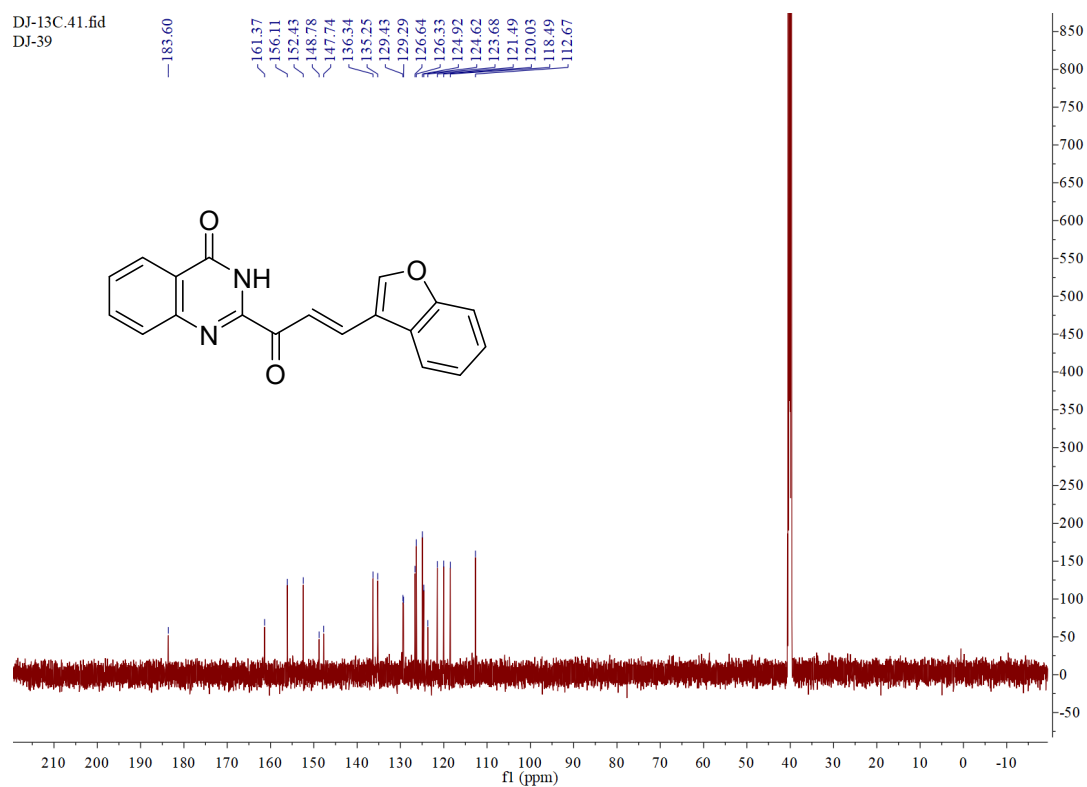

### HRMS spectrum

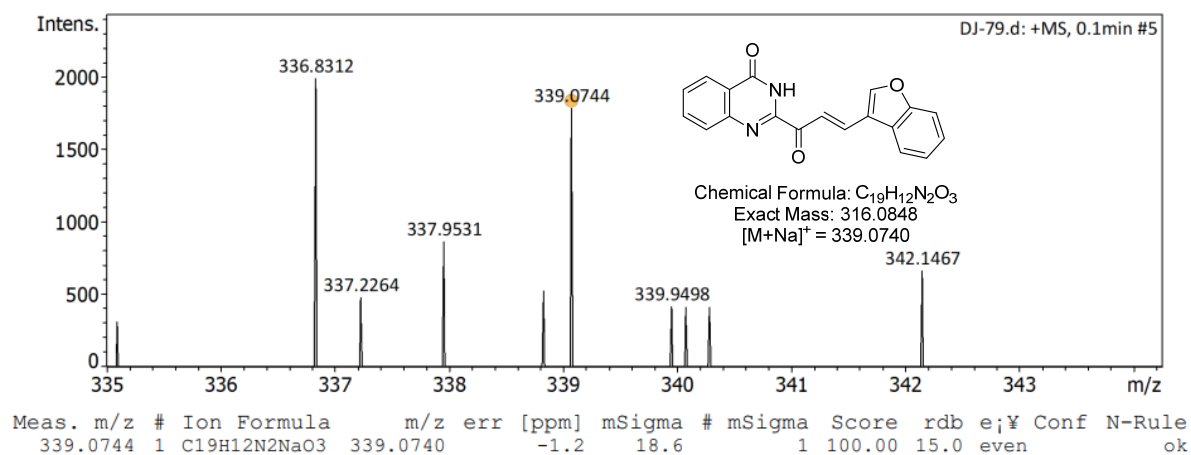

HPLC spectrum

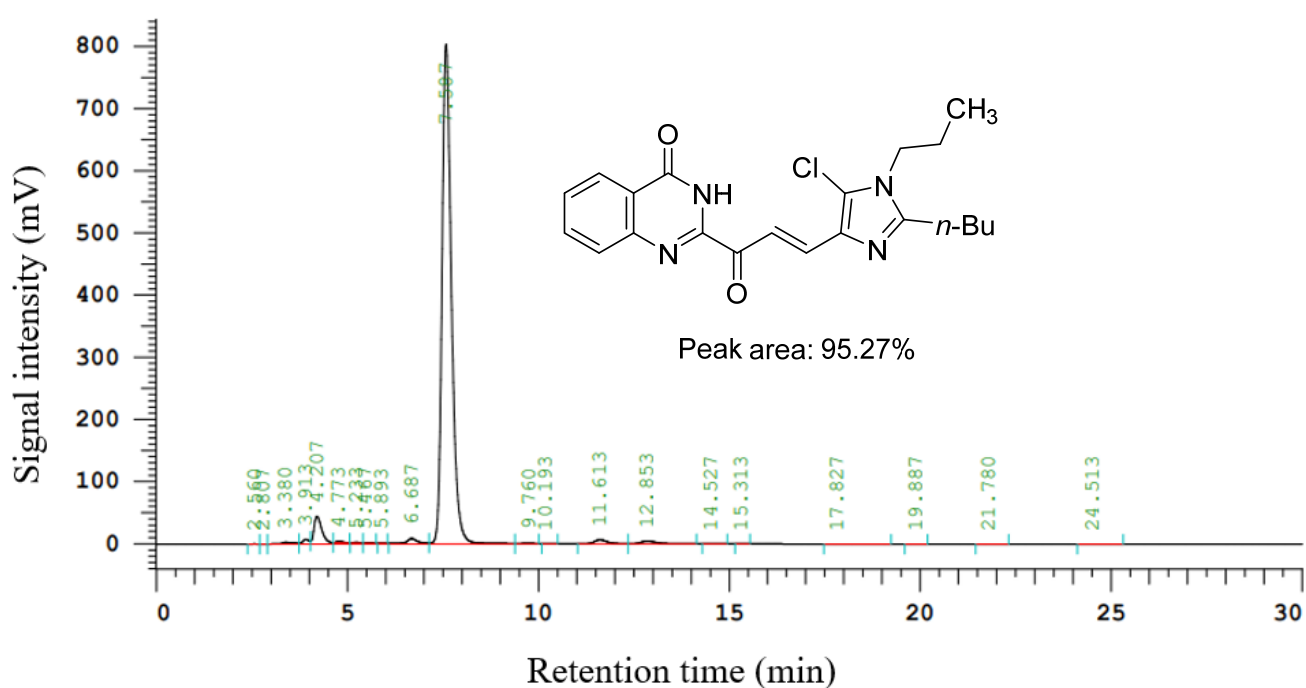

## 5.10 Spectra of compound 8b

$^1H$  NMR spectrum

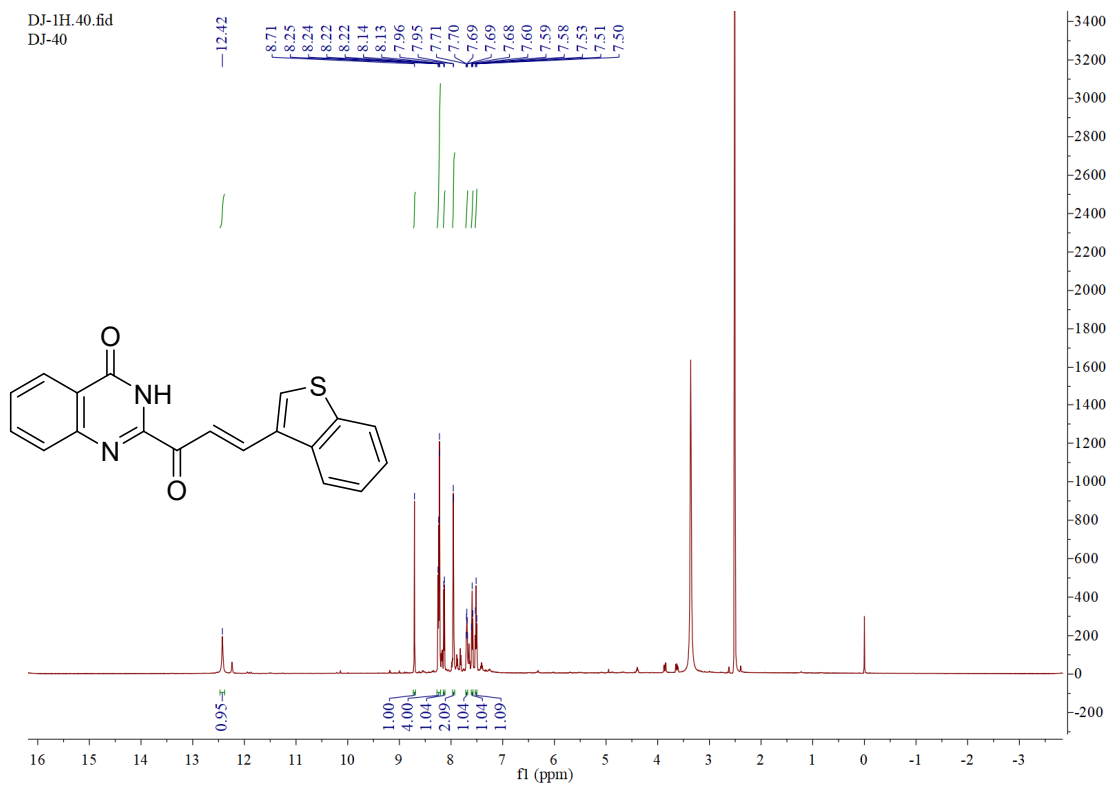

<sup>13</sup>C NMR spectrum

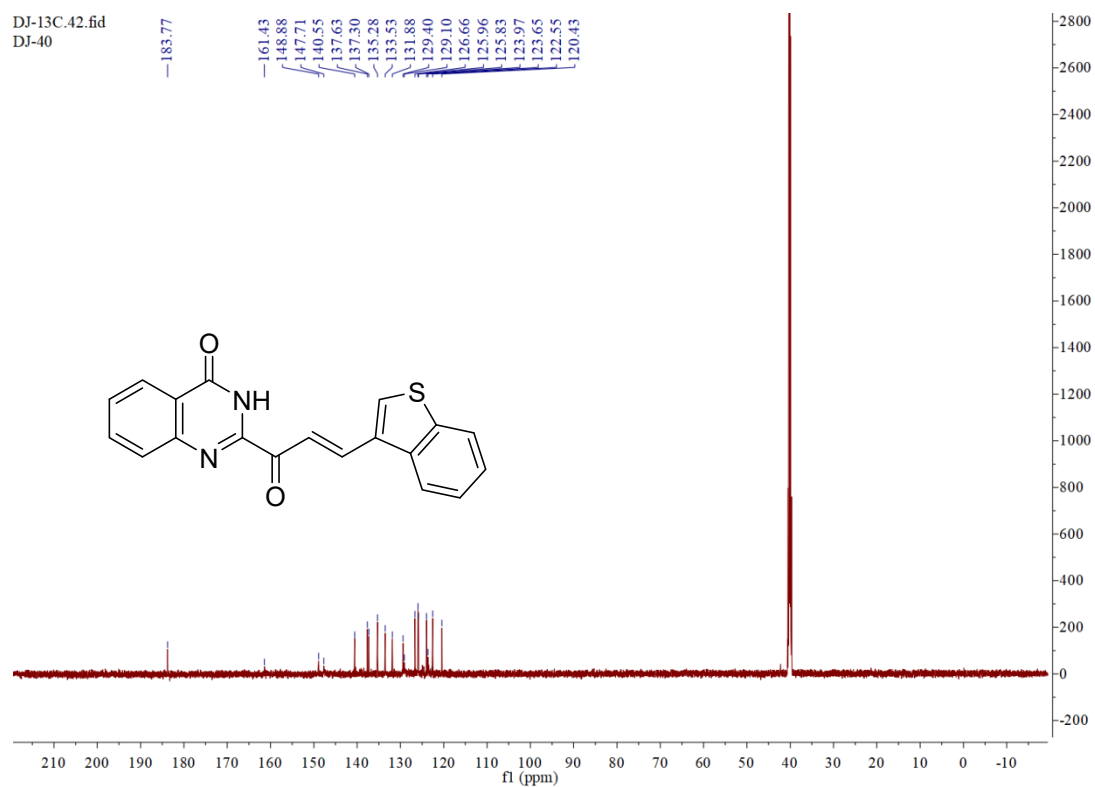

HRMS spectrum

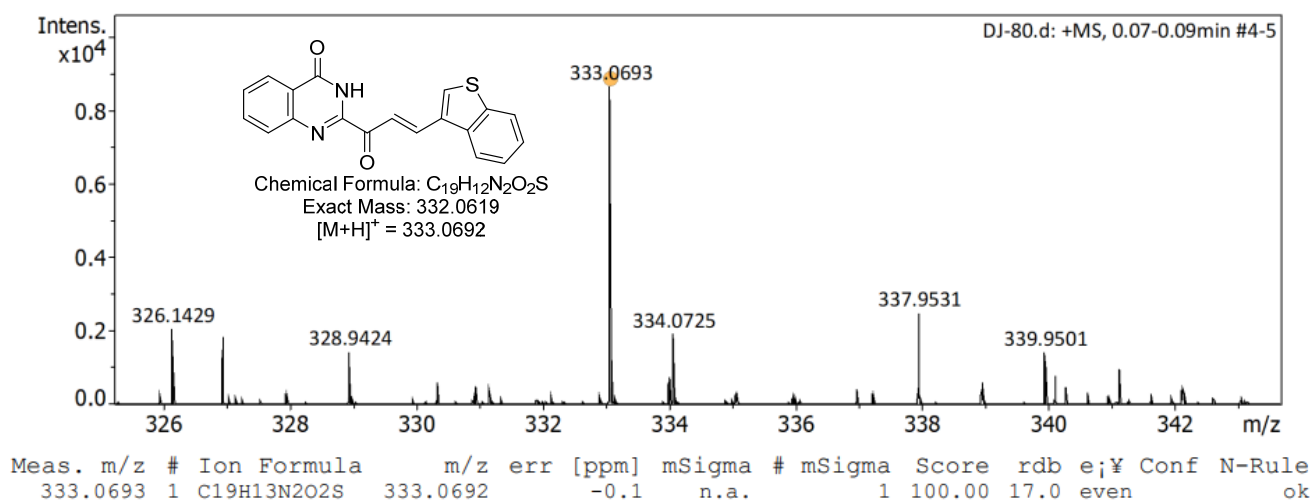

HPLC spectrum

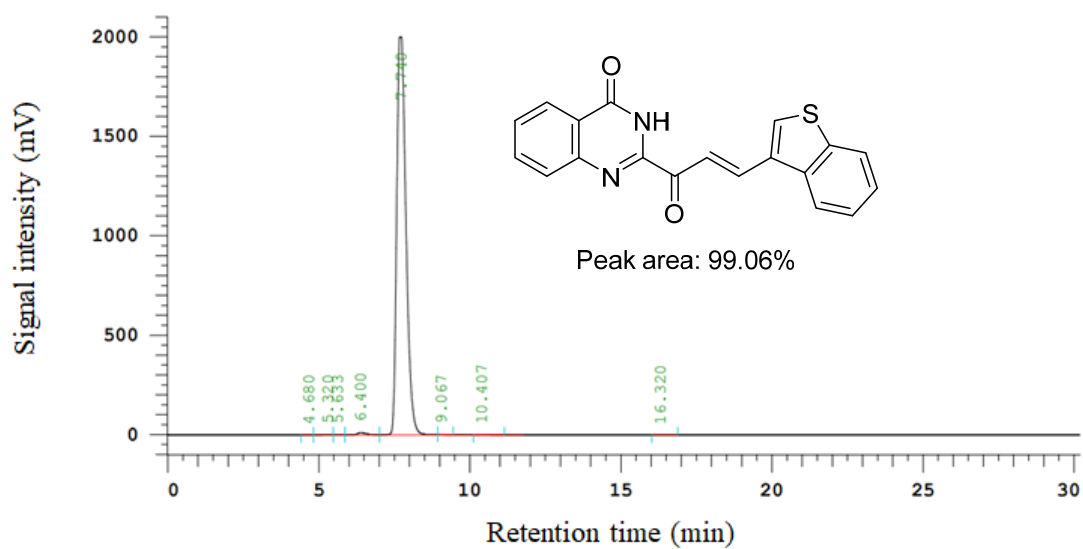

### 5.11 Spectra of compound **8c**

#### $^1H$ NMR spectrum

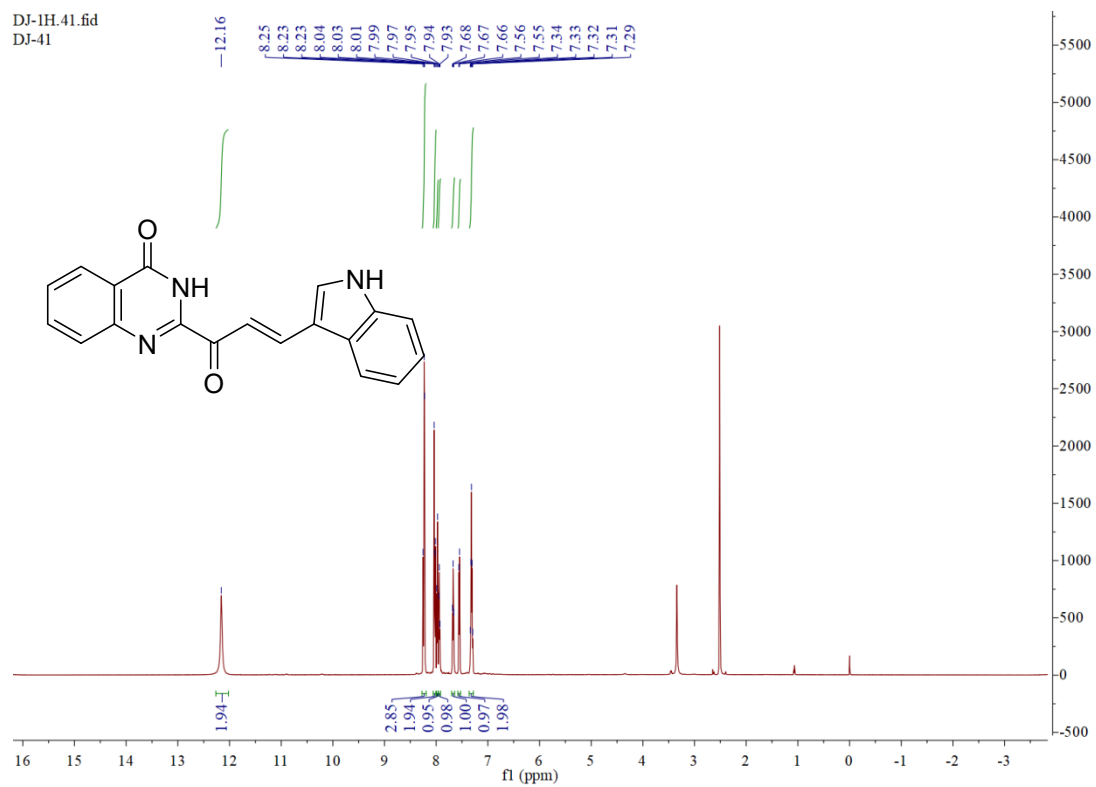

<sup>13</sup>C NMR spectrum

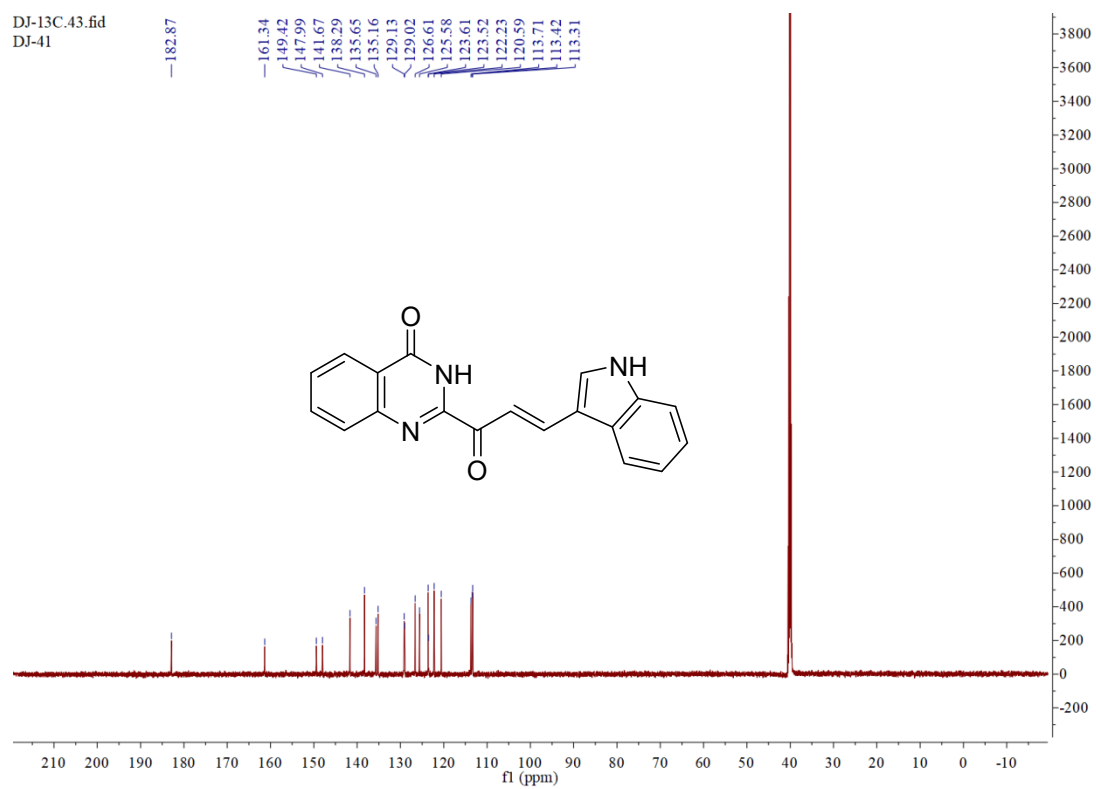

HRMS spectrum

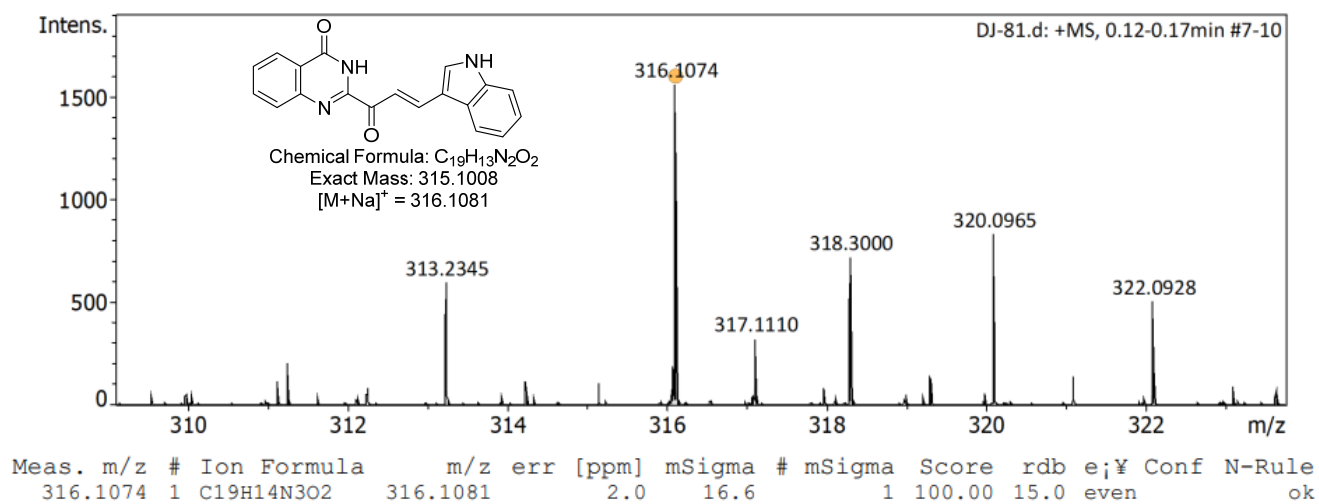

HPLC spectrum

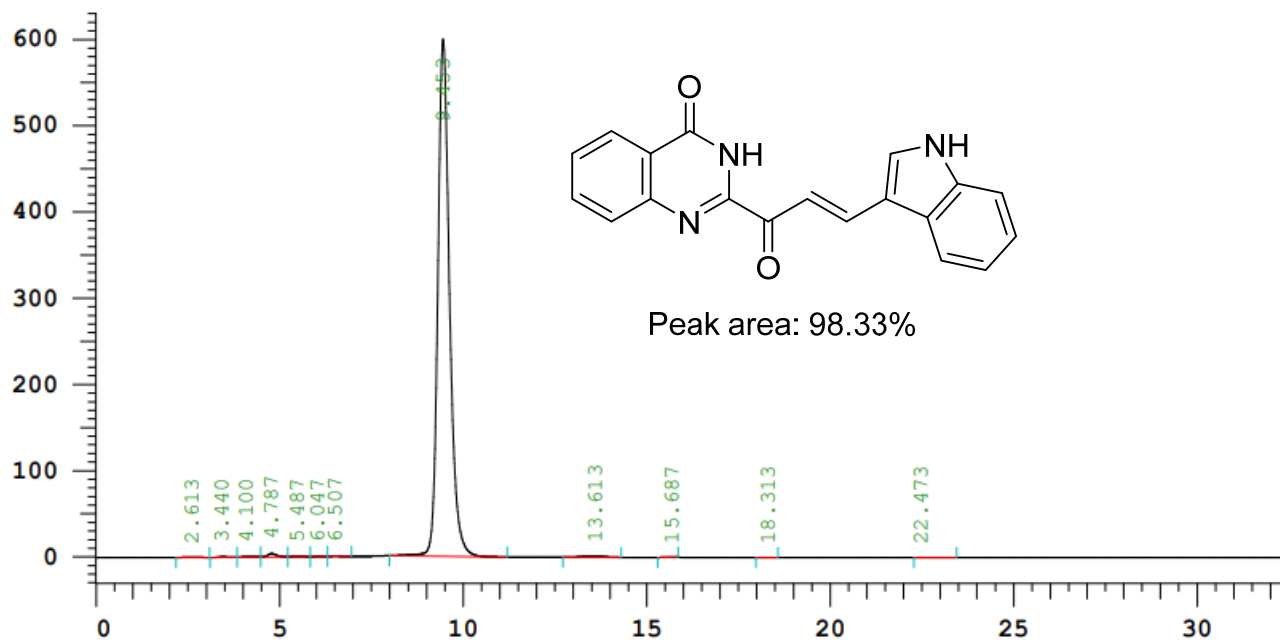

5.12 Spectra of compound **17a**

$^1H$  NMR spectrum

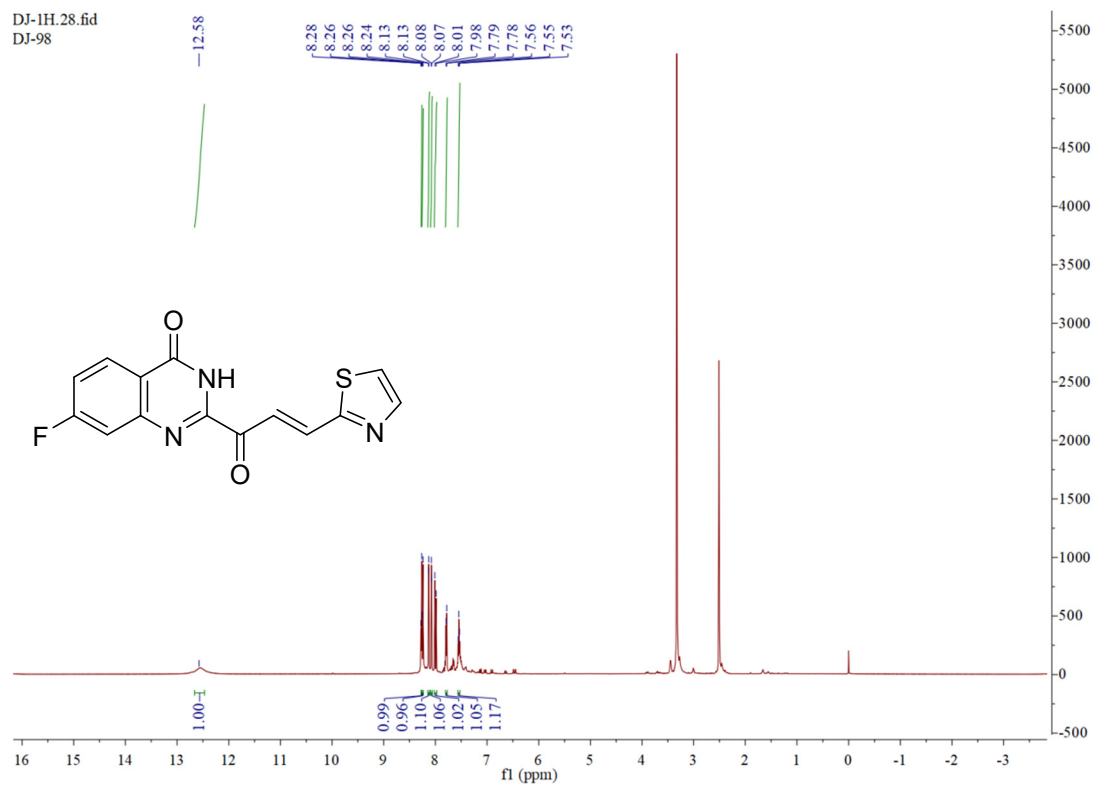

<sup>13</sup>C NMR spectrum

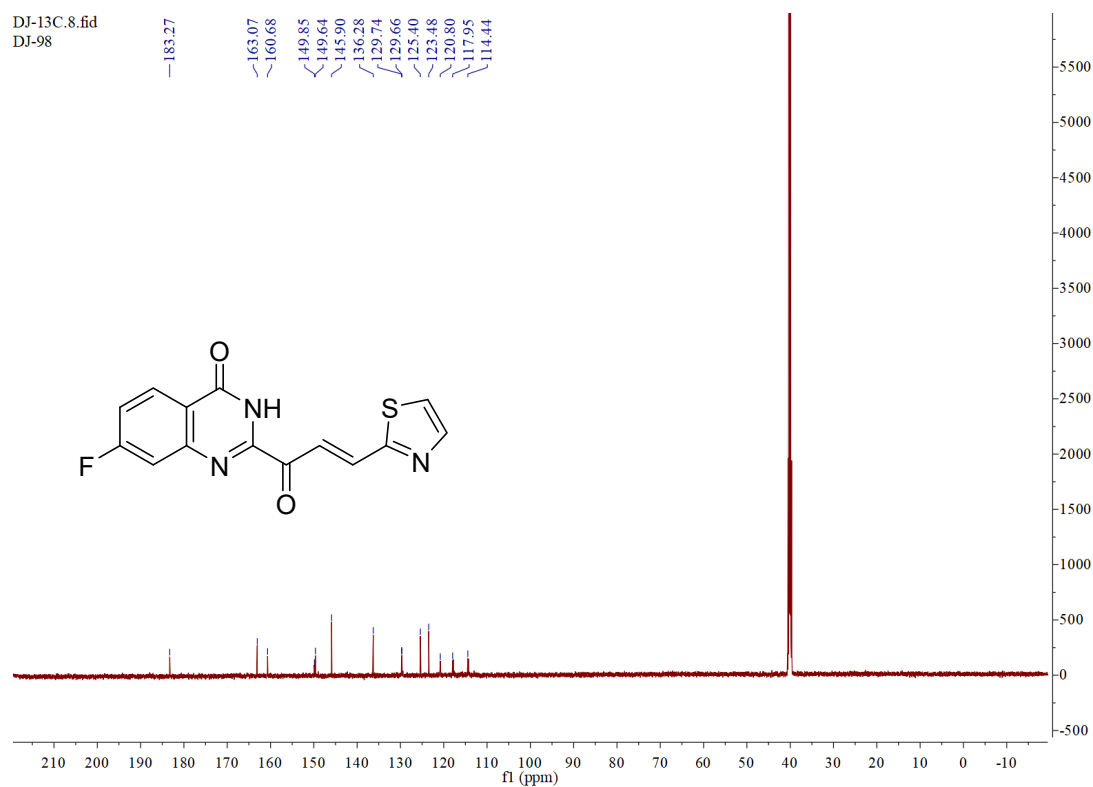

HRMS spectrum

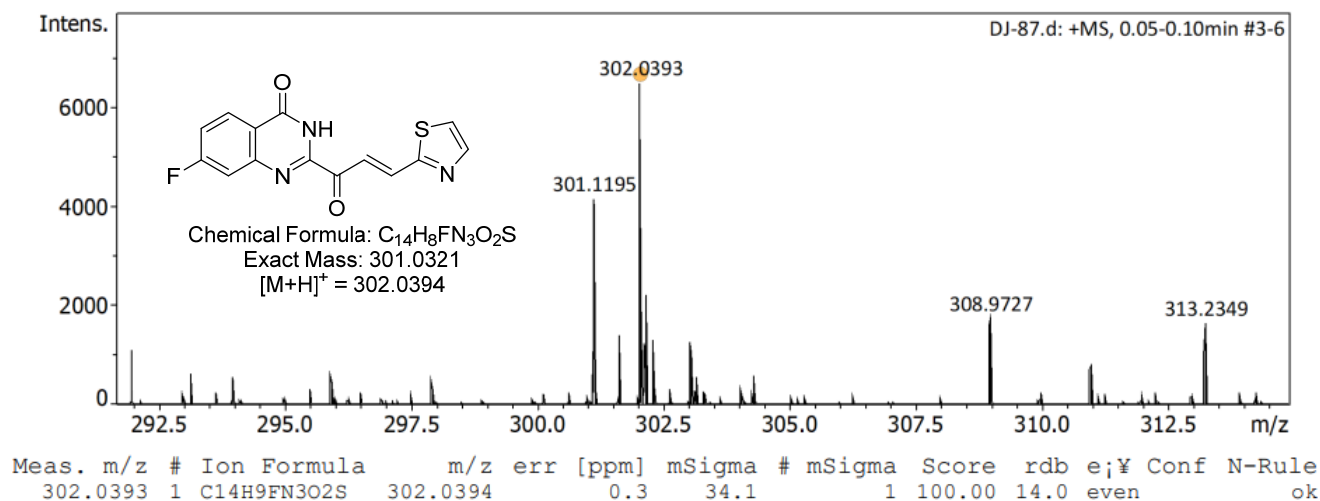

HPLC spectrum

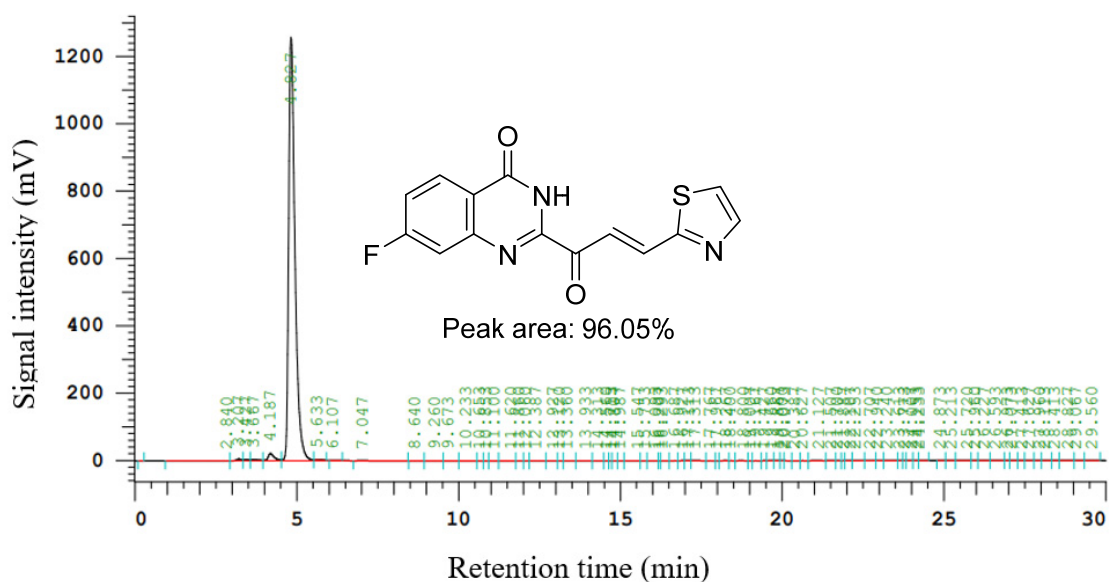

### 5.13 Spectra of compound **17b**

$^1H$  NMR spectrum

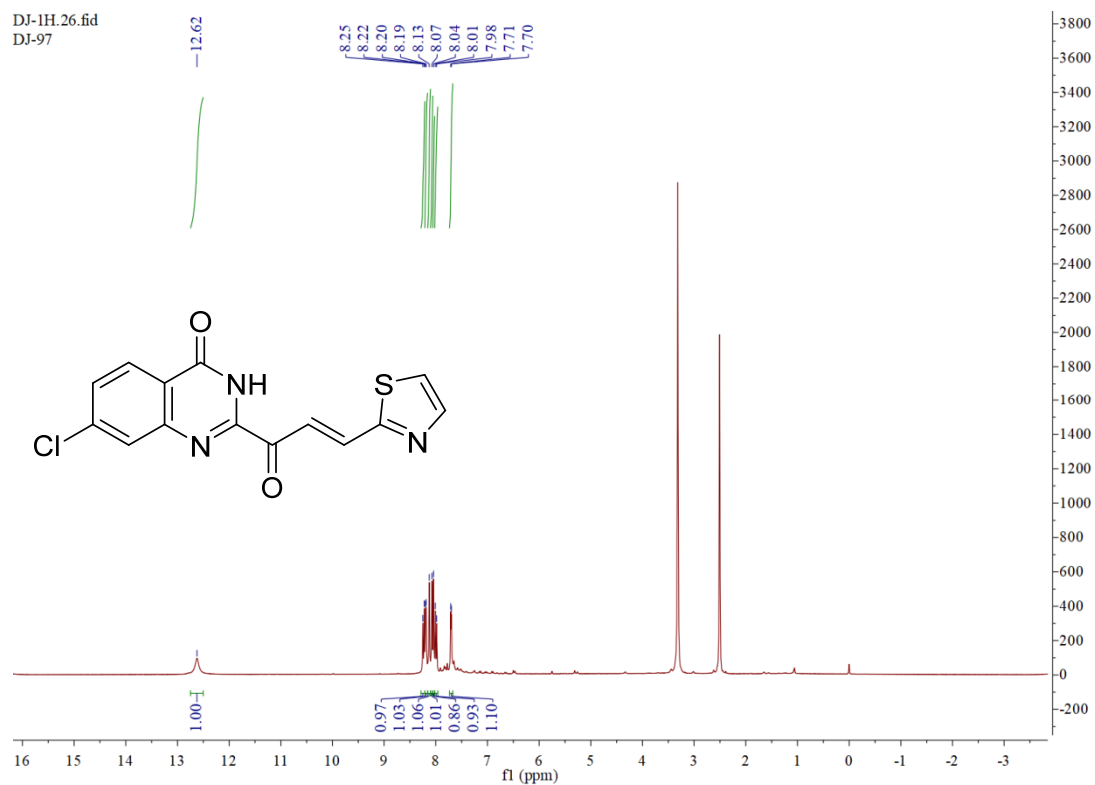

HRMS spectrum

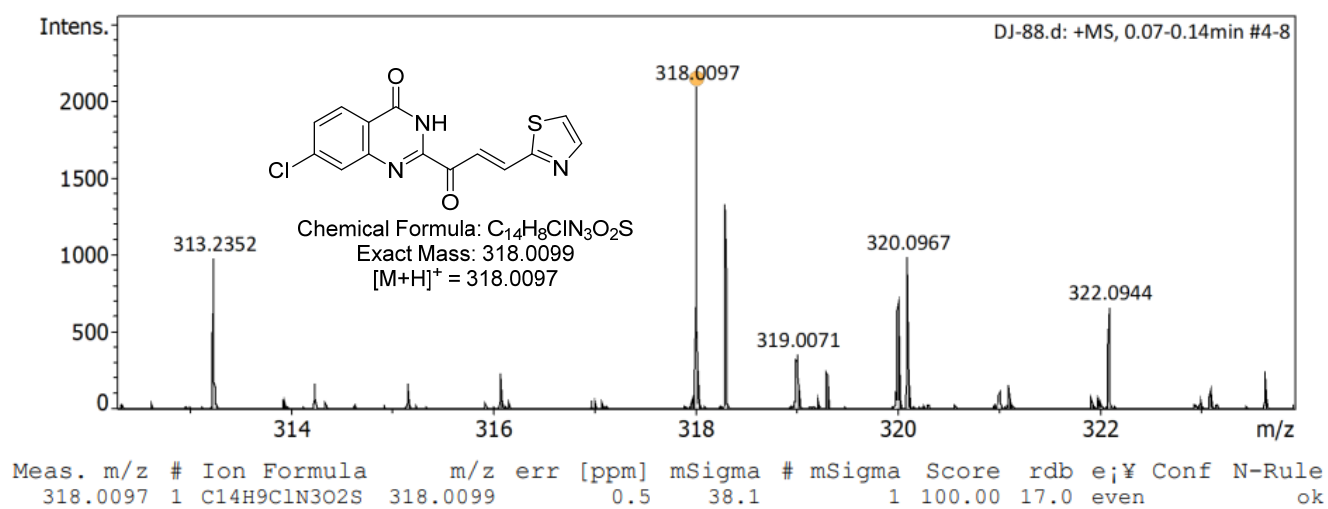

HPLC spectrum

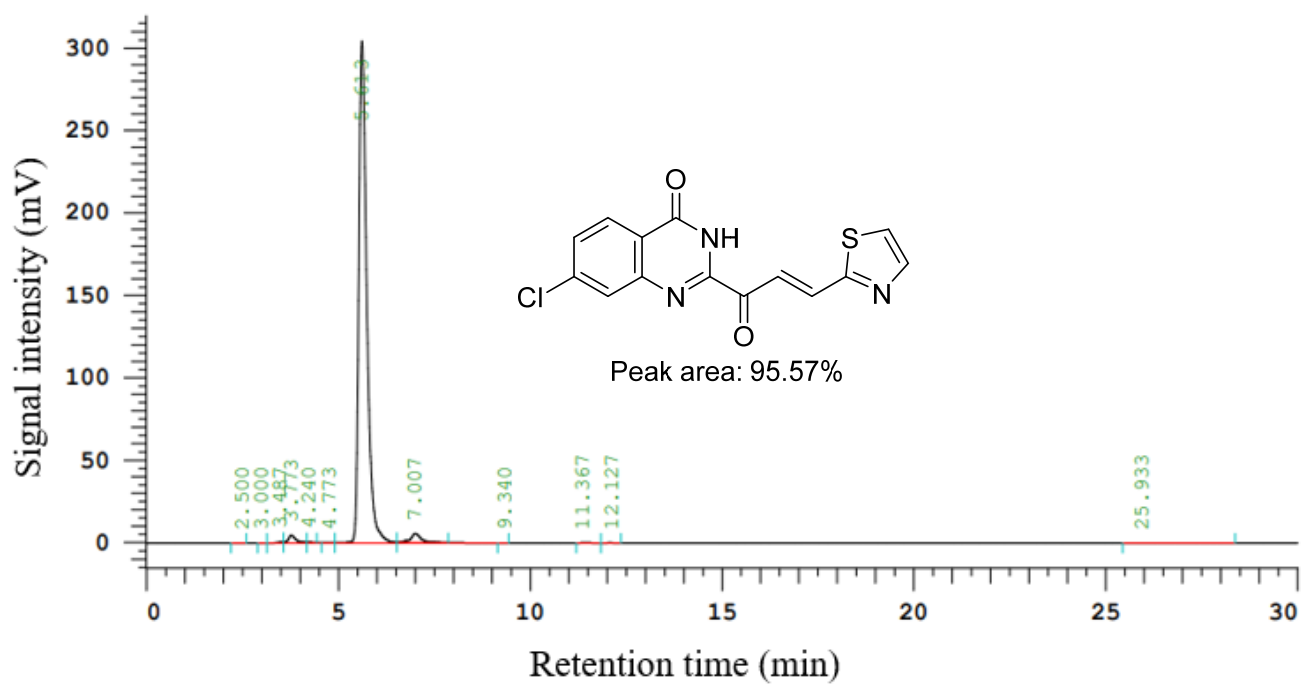

Supplement: Supplementary file 1 [file molecules-28-04240-s001.zip › molecules-2392517-supplementary.pdf]
